## 1 Evolution of stickleback spines through independent *cis*-regulatory changes at *HOXDB*

2  
3 Julia I. Wucherpfennig<sup>1</sup>, Timothy R. Howes<sup>2</sup>, Jessica N. Au<sup>1</sup>, Eric H. Au<sup>3</sup>, Garrett A. Roberts  
4 Kingman<sup>1</sup>, Shannon D. Brady<sup>1</sup>, Amy L. Herbert<sup>1</sup>, Thomas E. Reimchen<sup>4</sup>, Michael A. Bell<sup>5</sup>, Craig  
5 B. Lowe<sup>3</sup>, Anne C. Dalziel<sup>6</sup>, David M. Kingsley<sup>1,7,\*</sup>

- 6  
7 1. Department of Developmental Biology, Stanford University School of Medicine,  
8 Stanford, CA, 94305, USA.  
9 2. Department of Chemical and Systems Biology, Stanford University School of Medicine,  
10 Stanford, CA, 94305, USA.  
11 3. Department of Molecular Genetics and Microbiology, Duke University School of  
12 Medicine, Durham, NC, 27710, USA.  
13 4. Department of Biology, University of Victoria, Victoria, BC, V8W 2Y2, Canada.  
14 5. University of California Museum of Paleontology, University of California, Berkeley,  
15 94720, CA, USA.  
16 6. Department of Biology, Saint Mary's University, Halifax, Nova Scotia, B3H  
17 3C3, Canada.  
18 7. Howard Hughes Medical Institute, Stanford University School of Medicine, Stanford,  
19 CA, 94305, USA.

20 \*Correspondence: [kingsley@stanford.edu](mailto:kingsley@stanford.edu)

21  
22 Keywords: stickleback; *Hox* genes; evolution; development; *cis*-regulatory element; genome  
23 editing; patterning; skeletal biology; genetics; transposable elements

### 24 **Summary**

25  
26  
27 Understanding the genetic mechanisms leading to new traits is a fundamental goal of evolutionary  
28 biology. We show that *HOXDB* regulatory changes have been used repeatedly in different  
29 stickleback fish species to alter the length and number of bony dorsal spines. In *Gasterosteus*  
30 *aculeatus*, a variant *HOXDB* allele is genetically linked to shortening an existing spine and adding  
31 a spine. In *Apeltes quadracus*, a variant allele is associated with lengthening an existing spine and  
32 adding a spine. The alleles alter the same conserved non-coding *HOXDB* enhancer by diverse  
33 molecular mechanisms, including SNPs, deletions, and transposable element insertions. The  
34 independent *cis*-acting regulatory changes are linked to anterior expansion or contraction of  
35 *HOXDB* expression. Our findings support the long-standing hypothesis that natural *Hox* gene  
36 variation underlies key morphological patterning changes in wild populations and illustrate how  
37 different mutational mechanisms affecting the same region may produce opposite gene expression  
38 changes with similar phenotypic outcomes.  
39

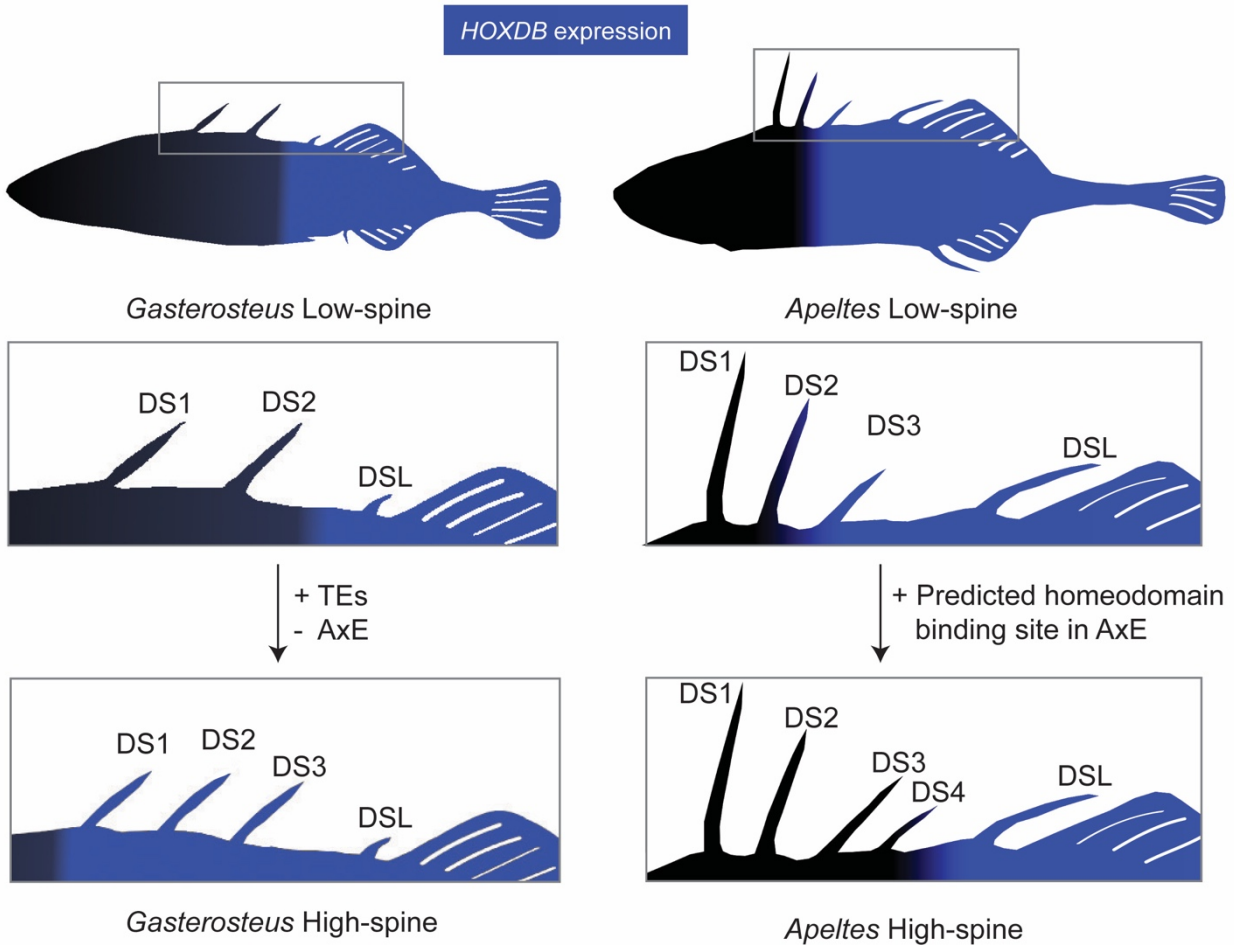

40  
41

## 42 **Introduction**

43

44 The origins of diverse vertebrate body plans have fascinated comparative anatomists and  
45 evolutionary biologists for centuries (Darwin, 1859; Owen, 1848). Although studies over the last  
46 forty years have now identified many key cellular pathways required for normal body axis  
47 formation and development using induced mutations in model organisms, it remains challenging  
48 to identify specific changes in genes and regulatory regions that underlie the diversity of body  
49 forms and traits in wild species (Stern and Orgogozo, 2008, 2009).

50

51 *Hox* genes were one of the first classes of major developmental genes to be identified and analyzed  
52 in comparative studies across many animal groups. They were initially discovered by linked  
53 clusters of mutations in *Drosophila* that had the remarkable ability to transform particular body  
54 segments into others (Lewis, 1978). Molecular cloning studies revealed that *Hox* loci consist of  
55 clustered homeodomain transcription factor genes, whose expression pattern along the Anterior-  
56 Posterior (A-P) body axis was correlated with their physical position along the chromosome  
57 (Bender et al., 1983; Carroll et al., 2005; Harding et al., 1985; Izpisua-Belmonte et al., 1991; Scott  
58 and Weiner, 1984).

59

60 In an early review of genetic work on homeotic loci, Ed Lewis hypothesized that regulatory  
61 mutations in *Hox* genes might underlie classic A-P patterning differences between species, such  
62 as four-winged versus two-winged insects (Lewis, 1978). Although subsequent studies showed  
63 that *Hox* expression patterns are actually conserved between two-winged fruit flies and four-  
64 winged butterflies (Carroll et al., 1995; Warren et al., 1994), the important role of *Hox* genes in  
65 controlling many aspects of body patterning has led to speculation that mutations in these genes  
66 underlie key morphological differences in nature (Carroll et al., 2005; Goldschmidt, 1940).  
67 Variation in *Hox* cluster number and structure across different taxa support this idea, and intriguing  
68 correlations can be drawn between morphological differences in body traits and *Hox* expression  
69 changes in other animal groups (Averof and Patel, 1997; Burke et al., 1995; Carroll et al., 2005).  
70 On the other hand, much of the diversification and expansion of *Hox* clusters occurred prior to  
71 well-known morphological changes among animal phyla (Carroll, 1995). Furthermore, many  
72 laboratory mutations in *Hox* genes lead to reduced viability or fertility, and prominent evolutionary  
73 biologists (Liu et al., 2019; Mayr, 1970), as well as critics of evolutionary biology (Wells, 2000),  
74 have suggested that natural mutations in *Hox* genes would most likely lead to “hopeless monsters”  
75 rather than adaptive changes in wild species. Natural differences in leg trichomes and abdominal  
76 pigmentation have previously been linked to genetic variation in *Hox* loci in insects, with  
77 regulatory mutations providing a possible mechanism for bypassing the broader deleterious  
78 consequences seen with many laboratory mutations (Stern, 1998; Tian et al., 2019). However, few  
79 detailed examples exist for the long-postulated idea that genetic changes in *Hox* loci may also be  
80 the basis for major changes in skeletal structures along the A-P body axis of wild vertebrates  
81 (Burke et al., 1995; Shashikant et al., 1998).

82  
83 Almost a third of extant vertebrate species fall in the large and diverse Acanthomorpha group of  
84 spiny-rayed fishes (Rosen, 1973), many of which show dramatic changes in the size, shape, or  
85 number of axial skeletal structures. A key evolutionary innovation of this group is the development  
86 of stiff, unsegmented bony spines anterior to the median dorsal and anal fins. These dorsal spines  
87 can be raised to protect against predators or lowered to facilitate swimming (Wainwright and  
88 Longo, 2017). The number, length, and morphology of bony spines differ substantially among  
89 species, and the spines can be freestanding or incorporated into segmented rays within the dorsal  
90 and anal fins (Mabee et al., 2002). Recent studies have begun to reveal how spines form and grow  
91 within the median fin fold of developing fish (Höch et al., 2021; Howes et al., 2017; Roberts  
92 Kingman et al., 2021a). However, little is known about the detailed molecular changes that  
93 underlie the diverse patterns of spines seen in different fish species.

94  
95 Sticklebacks form a diverse clade of fish within the Acanthomorpha. Multiple genera of  
96 sticklebacks live in the marine and freshwater environments around the northern hemisphere and  
97 diverged over 16 million years ago (Aldenhoven et al., 2010; Kawahara et al., 2009; Mattern,  
98 2006). The most well studied of these species, *Gasterosteus aculeatus*, also known as the  
99 threespine stickleback, colonized many new freshwater postglacial habitats from the oceans  
100 following widespread melting of glaciers at the end of the last ice age, approximately 12,000 years  
101 ago (Bell and Foster, 1994). In new freshwater environments containing different food sources and  
102 predators, *Gasterosteus* populations have evolved substantial differences in craniofacial structures,  
103 vertebrae, and the number of defensive bony plates and spines along the A-P body axis (Bell and  
104 Foster, 1994). Many of the recently evolved populations show loss or reduction of structures  
105 previously present in ancestral forms, including loss of armor plates, loss of the pelvic hind fins,

106 reduction of spine lengths, and reduction of body pigmentation (Chan et al., 2010; Colosimo et al.,  
107 2005; Howes et al., 2017; Miller et al., 2007). However, recently derived populations can also  
108 evolve increases in size or number of structures, including increased body size, increased number  
109 of teeth, increased spine length, and increased number of spines in the dorsal midline (Cleves et  
110 al., 2014; Moodie, 1972; Roberts Kingman et al., 2021a; Spoljaric and Reimchen, 2011).

111  
112 Here, we use genetic and genomic approaches in two different stickleback genera to study the  
113 molecular mechanisms involved in spine patterning changes in natural populations. Our studies  
114 provide new evidence to support the long-standing hypothesis that mutations in the *cis*-regulatory  
115 regions of *Hox* genes underlie adaptive evolution of skeletal patterns along the A-P body axis of  
116 wild vertebrate species.

## 117 118 **Results**

### 119 120 **QTL mapping of stickleback spine number and length in *Gasterosteus aculeatus***

121  
122 To study the genetics of spine number in *Gasterosteus aculeatus*, we generated a large F2 cross  
123 by crossing a wild-caught female freshwater stickleback from Boulton Lake, British Columbia,  
124 Canada and a wild-caught male marine stickleback from Bodega Bay, California, USA. The  
125 Bodega Bay male fish had the three dorsal spines typically seen in *Gasterosteus aculeatus*. The  
126 Boulton Lake female fish had two dorsal spines, as is true for 80% of the stickleback fish found in  
127 the lake; the other 20% of fish have three dorsal spines (Reimchen, 1980). We intercrossed F1  
128 males and females that each had three dorsal spines and raised 590 F2 offspring from the largest  
129 family (Figure 1A). Most F2 individuals had three dorsal spines, but six had two dorsal spines, and  
130 twenty-one had four dorsal spines. For comparison of phenotypes among fish that varied in spine  
131 patterns, we numbered spines from anterior to posterior, with the posterior-most spine immediately  
132 in front of the dorsal fin being called dorsal spine last (DSL). Therefore, a four-spine *Gasterosteus*  
133 has dorsal spine 1 (DS1), dorsal spine 2 (DS2), dorsal spine 3 (DS3), and dorsal spine last (DSL),  
134 which we refer to as a high-spine phenotype. A typical three-spine *Gasterosteus* has dorsal spine  
135 1 (DS1), dorsal spine 2 (DS2), and dorsal spine last (DSL), which we refer to here as a low-spine  
136 phenotype in the context of this study (Figure S1A).

137  
138 To examine the genetic basis of morphological phenotypes along the A-P body axis, we genotyped  
139 340 fish from the family using a custom SNP array (Jones et al., 2012a) and phenotyped the fish  
140 for the number of dorsal spines, the length of dorsal spines, the number of flat bony plates that  
141 form in the dorsal midline or at the base of spines (pterygiophores), and the number of abdominal,  
142 caudal, and total vertebrae (Figures 1B and S1). There were not enough two-spine fish for the  
143 mapping of the two- versus three-spine trait. When mapping three- versus four-spine as a  
144 categorical trait, we detected a significant quantitative trait locus (QTL) on the distal end of  
145 chromosome 6. The same chromosome region also scored as a significant QTL for DS2 length.  
146 The allele linked to both the increase in spine number and the decrease in DS2 length was the allele  
147 inherited from the freshwater Boulton parent. None of the vertebral traits mapped to the distal end  
148 of chromosome 6 (Figure S1), suggesting that the effect of this chromosome region was specific  
149 to patterning dorsal spine number and length but not to axial patterning as a whole. Previous studies  
150 of other stickleback populations have identified other loci that control vertebral number (Berner et  
151 al., 2014; Miller et al., 2014).

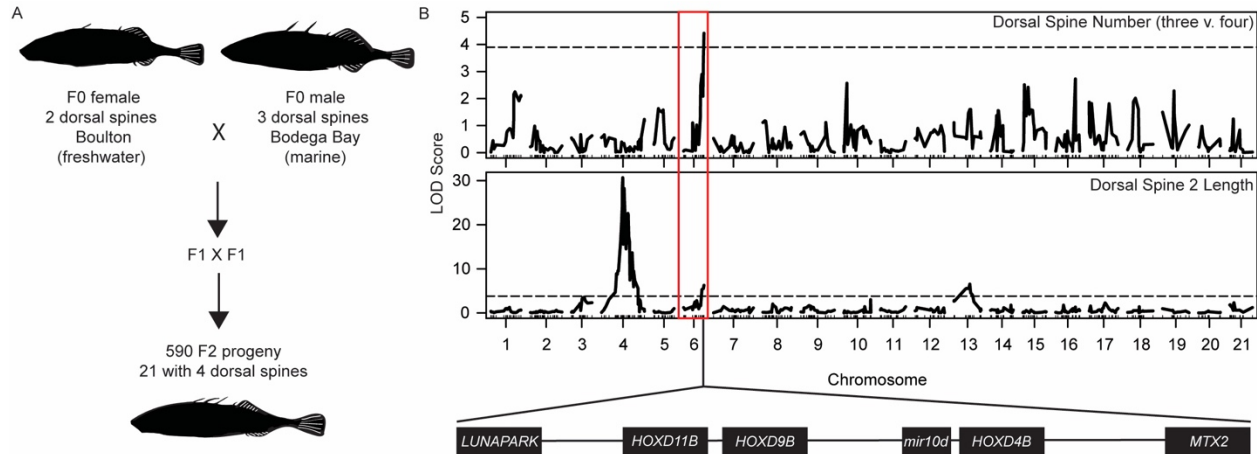

152  
153 **Figure 1. Increased dorsal spine number and decreased dorsal spine 2 length maps to a**  
154 **chromosome 6 region containing the *HOXDB* cluster.** **A.** *Gasterosteus* QTL mapping cross. **B.**  
155 QTL scan results for dorsal spine number (three- versus four-spine) and DS2 length from F2  
156 progeny of the Boulton Lake and Bodega Bay cross. The x-axis shows the chromosomes in the  
157 *Gasterosteus* genome, and the y-axis shows the LOD score for spine number (top) and length of  
158 DS2 (bottom). The QTL peak on the distal end of chromosome 6 includes the *HOXDB* cluster  
159 drawn below the plot. The major peak for DS2 length on chromosome 4 contains the *EDA-MSX2A-*  
160 *STC2A* supergene complex, which has been described elsewhere (Howes et al., 2017; Roberts  
161 Kingman et al., 2021a). Dashed lines: genome-wide significance threshold based on permutation  
162 testing.

163  
164 ***HOXDB* is in the candidate interval and expressed in *Gasterosteus* spines**

165 The distal end of chromosome 6 contains the *HOXDB* locus in *Gasterosteus*. While this locus is  
166 unannotated in the *Gasterosteus aculeatus* reference genome (gasAcu1, (Jones et al., 2012b)),  
167 previous studies of *Hox* clusters across multiple species suggest the locus includes three genes  
168 (*HOXD11B*, *HOXD9B*, and *HOXD4B*) and one microRNA (*miR-10d*) (Hoegg et al., 2007). *Hox*  
169 genes are known to be expressed in the neural tube and somites as the body axis forms early in  
170 development (Ahn and Gibson, 1999b, 1999a). To investigate *HOXDB* gene expression in  
171 sticklebacks, we used *in situ* hybridization during embryonic axis formation (stage 19/20; Swarup,  
172 1958). *HOXD4B* was expressed in the hindbrain, neural tube, and anterior-most somites, *HOXD9B*  
173 was expressed more posteriorly in the somites and neural tube, and *HOXD11B* was expressed in  
174 the most posterior somites and tailbud (Figure S2), consistent with similar colinear patterns found  
175 in many other organisms (Burke et al., 1995; Carroll et al., 2005).

176 Dorsal spines form weeks after early embryonic patterning within a median fin that encircles the  
177 developing stickleback (stages 28-31; Swarup, 1958). To examine expression at later stages, we  
178 designed a knock-in strategy to introduce an eGFP reporter gene upstream of the endogenous  
179 *HOXD11B* locus using CRISPR-Cas9 (Figure 2A). This was done to assess more time points than  
180 possible by *in situ* hybridization and also because probe penetration became a problem at later time  
181 points. The reporter line was generated in an anadromous *Gasterosteus* background from the Little  
182 Campbell River, British Columbia, Canada, a typical three-spine *Gasterosteus* stickleback  
183 population that migrates between marine and freshwater environments (Hagen, 1967). At stage  
184 19/20, we saw GFP expression in the posterior somites and tail bud, a pattern that recapitulated



185 the *HOXD11B* *in situ* hybridization expression already observed at the same early embryonic stage  
186 (Figure 2B, Figure S2C). Later in development at stage 31, when the dorsal spines are forming,  
187 we saw expression in the posterior half of the fish (Figure 2C) and in the dorsal fin fold between  
188 the DS2 and DSL, the DSL, and the dorsal fin (Figure 2D). We also saw expression in the anal fin  
189 and anal spine. This reporter expression suggests that *HOXD11B* is expressed both in early  
190 development and later during dorsal spine formation in the median fin (a conclusion also supported  
191 by RNA-sequencing experiments, see below and Figure S4).

A Integration of eGFP reporter plasmid in endogenous locus

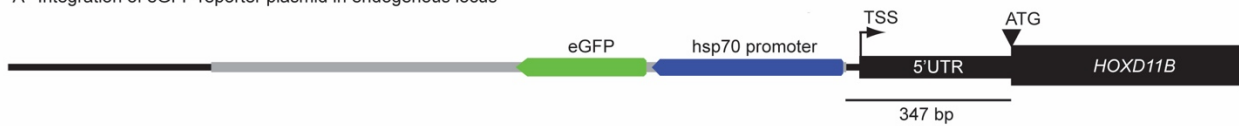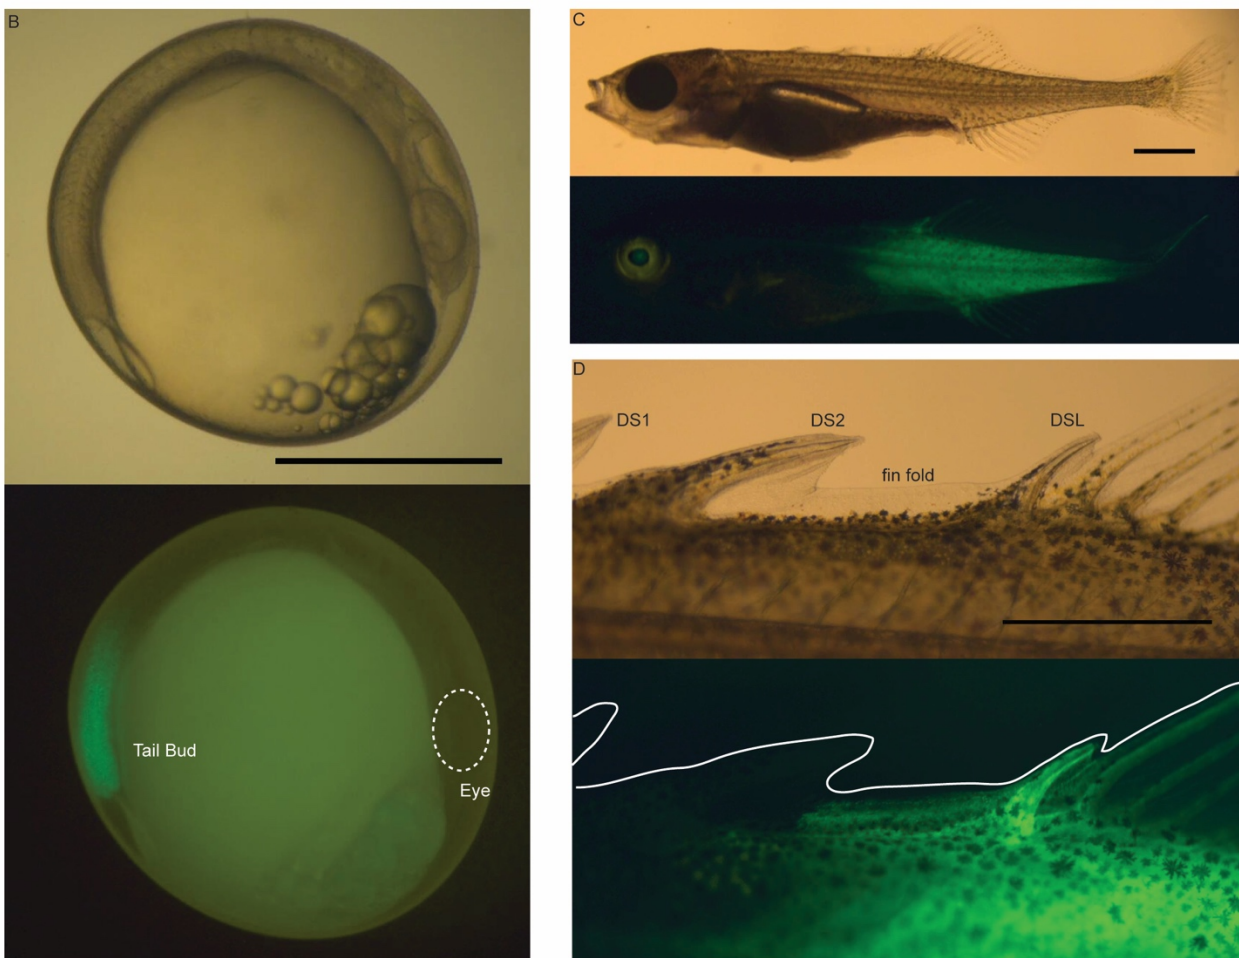

192  
193 **Figure 2. GFP reporter upstream of *Gasterosteus HOXD11B* shows expression in somites,**  
194  **fins, and spines. A.** Schematic of the integration of the reporter plasmid by CRISPR-Cas9  
195 upstream of the endogenous *HOXD11B* locus of low-spine *Gasterosteus*. The plasmid is in gray;  
196 eGFP is in green; hsp70 promoter is in blue; the endogenous locus is in black. **B.** Embryonic  
197 expression in the somites in the tailbud at Swarup stage 19/20. The pattern recapitulates the *in situ*  
198 hybridization results for *HOXD11B* (Figure S2C). The dotted circle shows the location of the eye.  
199 **C.** GFP expression at Swarup stage 31 when the dorsal spines are formed. GFP expression was

200 seen in the posterior half of the fish. **D.** In the dorsal structures, GFP expression was seen in the  
201 fin fold between DS2 and DSL, the DSL, and the dorsal fin. All scale bars are 1 mm.

202 To determine if *HOXD11B* genes are functionally important for dorsal spine patterning, we used  
203 CRISPR-Cas9 to target the coding region of *HOXD11B* in typical anadromous low-spine  
204 *Gasterosteus* (Little Campbell, British Columbia, Canada). Fish in the F0 generation that were  
205 mosaic for different mutations in the coding region of *HOXD11B* showed significantly longer DSL  
206 compared to their uninjected control siblings (Figure 3, two-tailed t-test;  $p=7E-06$ ,  $n=18$  control  
207 and 23 injected). The anal spine (AS) was also significantly longer in the F0 injected fish (Figure  
208 3, two-tailed t-test;  $p=0.006$ ,  $n=18$  control and 23 injected). In addition to the spine length, we also  
209 saw an effect on the number of bony basal plates or pterygiophores along on the dorsal midline of  
210 the fish (Figure S1). While low-spine *Gasterosteus* develop with either one or two blank (non-  
211 spine bearing) pterygiophores between DS2 and DSL, all CRISPR-Cas9 targeted fish developed  
212 with only one pterygiophore ( $n=5/18$  control with two blank pterygiophores;  $n=0/23$  injected F0  
213 mutants with two blank pterygiophores, two-tailed Fisher's exact test  $p=0.01$ ). To further validate  
214 the CRISPR results, we also tested the effect of *HOXD11B* targeting in a second anadromous  
215 population (Rabbit Slough, Alaska, USA). Again, we observed a significant effect on the length  
216 of both the DSL and AS (Figure S3, two-tailed t-test; DSL  $p=1E-13$ , AS  $p=4E-08$ ,  $n=38$  injected  
217 and  $n=30$  control from 3 clutches combined). Because the Rabbit Slough control population does  
218 not have variable pterygiophore numbers, an effect on blank pterygiophores could not be examined.  
219 These results show that *HOXD11B* is functionally important to the patterning of the dorsal spines,  
220 specifically DSL length and pterygiophore number.

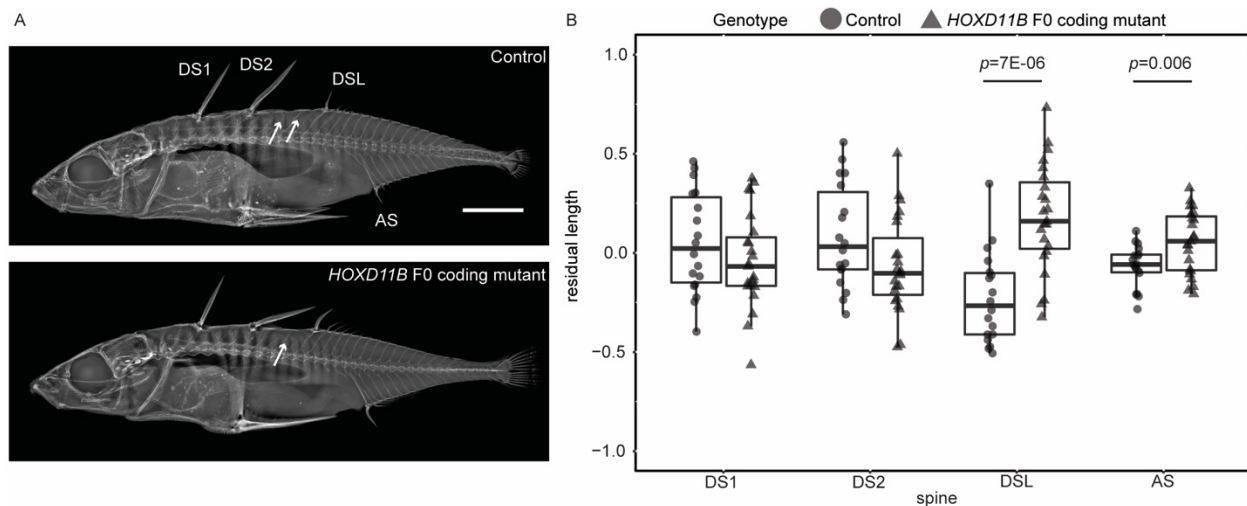

221 **Figure 3. Coding mutations in *HOXD11B* change *Gasterosteus* spine length.** **A.** X-ray of an  
222 uninjected *Gasterosteus* (top) and *Gasterosteus* injected at the single-cell stage with Cas9 and an  
223 sgRNA targeting the coding region of *HOXD11B* (bottom). DS1, dorsal spine 1; DS2, dorsal spine  
224 2; DSL, dorsal spine last; AS, anal spine. Arrows point to blank pterygiophores between DS2 and  
225 DSL; two blank pterygiophores are only seen in uninjected fish (see text). The scale bar is 5 mm.  
226 **B.** Quantification of length differences in dorsal and anal spines. The y-axis is the residual after  
227 accounting for the fish standard length (Figure S1A). DSL and AS were significantly longer in the  
228 injected *HOXD11B* F0 coding mutants compared to the controls (two-tailed t-test,  $n=18$  control  
229 and  $n=23$  injected, DSL  $p=7E-06$ , AS  $p=0.006$ ). There was no significant difference in spine  
230 length in DS1 and DS2.  
231

232

### 233 ***HOXDB* gene expression is expanded in dorsal spines of high-spine *Gasterosteus***

234

235 To examine whether four-spine/high-spine *Gasterosteus* fish have *cis*-acting regulatory changes  
236 in *HOXDB* gene expression, we generated F1 hybrids between low-spine and high-spine stocks  
237 and used RNA-sequencing to look for allele-specific expression patterns that were detectable even  
238 when both alleles were present in the same trans-acting environment. The hybrids were generated  
239 by crossing Little Campbell River anadromous fish, which predominantly have three dorsal spines  
240 (referred to as low-spine), with a stock descended from the QTL progeny that carry the Boulton  
241 *HOXDB* allele and predominantly show four or five spines (referred to as high-spine, see methods,  
242 RNA-sequencing section). In this cross, 77% of the 57 F1 hybrids had three dorsal spines, 21%  
243 had four dorsal spines, and one fish had five dorsal spines. RNA was isolated from micro-  
244 dissections of each dorsal spine (DS1, DS2, DS3 (if present), DSL), blank pterygiophore (Pter),  
245 dorsal fin (DF), and anal fin (AF) at the developing fin fold stage (displayed in Figure 4A). RNA  
246 was also isolated from whole embryos at embryonic stage 19/20.

247

248 All three *HOXDB* genes were expressed in the whole embryo samples from stages 19/20 (Figure  
249 4B). Reads from RNA sequencing were assigned to low- or high-spine *HOXDB* alleles using  
250 exonic single nucleotide variants (SNVs) that differ between Little Campbell or Boulton  
251 haplotypes. *HOXD9B* showed no significant allele-specific expression differences at 5 different  
252 informative SNVs. *HOXD11B* showed differences at three out of eight SNVs (binomial test  $p <$   
253  $0.01$ ), and *HOXD4B* showed differences at all three of the informative SNVs (binomial test  $p <$   
254  $0.001$ ) (Figure 4B). Different results for different SNPs may reflect the heterogeneity of expression  
255 locations and gene isoforms present in whole embryos. Overall, there were no striking differences  
256 in expression between the two alleles at the embryonic timepoint.

257

258 At the later fin fold stage, we sequenced dissected tissues from twelve three-spined and six four-  
259 spined F1s. We compared the expression in the dorsal spines and fins to anal fin expression as a  
260 control. DS1, DS2, and DS3 showed allele-specific expression differences of all three *HOXDB*  
261 genes. In each case, substantially higher expression was seen from the high-spine parent allele  
262 (Figure 4B). The expression differences were seen in all F1 hybrid siblings, regardless of whether  
263 they had a three- or four-spined phenotype. Elevated expression of the high-spine allele was not  
264 seen for the Pter, DSL, or DF locations (Figure 4B). In DS1 and DS2, almost all detectable  
265 sequence reads for all three *HOXDB* genes came from the high-spine *Gasterosteus* allele, and very  
266 few or none came from the low-spine *Gasterosteus* allele. This is consistent with the previous  
267 patterns observed with the *HOXD11B* low-spine GFP reporter line, which showed expression of  
268 the low-spine allele at posterior, but not anterior, locations in the fin fold (Figure 2D). The elevated  
269 expression coming from the high-spine allele led to a significant positive log<sub>2</sub> ratio of high-spine  
270 to low-spine expression in each of the dorsal spines when compared to the anal fin (DS1:  
271 *HOXD11B* (chrVI:17756571)  $p = 3E-07$ ; *HOXD9B* (chrVI:17764664)  $p = 6E-06$ ; *HOXD4B*  
272 (chrVI:17783616)  $p = 1E-05$ ; DS2: *HOXD11B* (chrVI:17756571)  $p = 3E-07$ ; *HOXD9B*  
273 (chrVI:17764664)  $p = 4E-07$ ; *HOXD4B* (chrVI:17783616)  $p = 4E-07$ ; DS3: *HOXD11B*  
274 (chrVI:17756571)  $p = 4E-04$ ; *HOXD9B* (chrVI:17764664)  $p = 8E-04$ ; *HOXD4B* (chrVI:17783616)  
275  $p = 6E-04$ , all  $p$ -values by Mann Whitney U test). Similar results were seen for all SNVs that were  
276 scoreable in the three *HOXDB* genes (*HOXD11B* 9 SNVs; *HOXD9B* 4 SNVs; *HOXD4B* 2 SNVs).



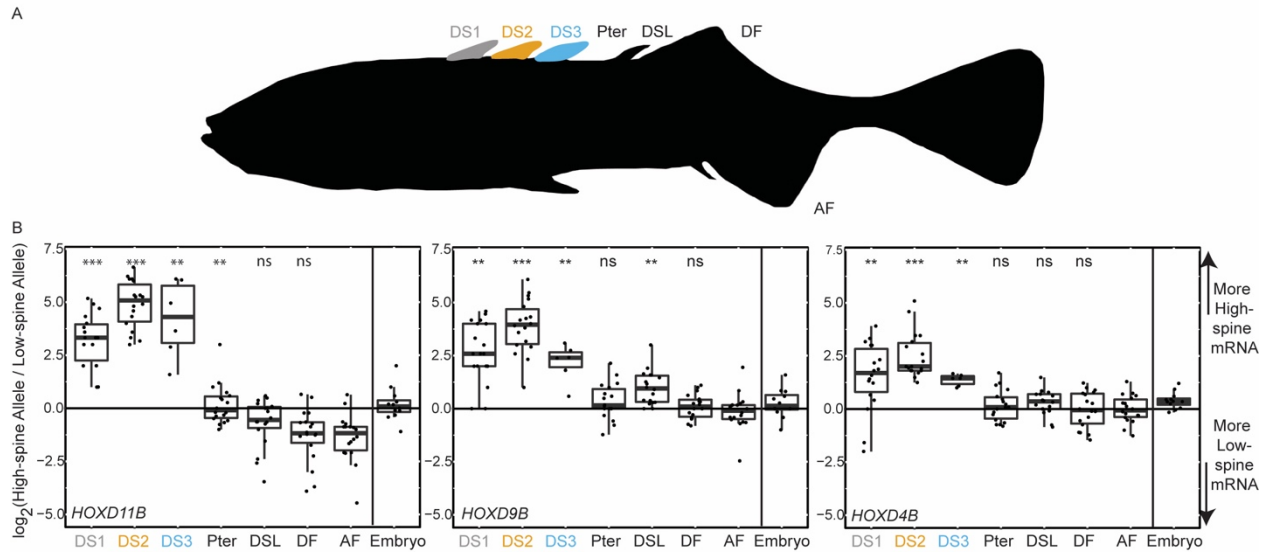

277  
278

279 **Figure 4. *HOXDB* genes show cis-acting expression differences in *Gasterosteus* spines.** **A.** F1  
280 progeny were generated in a cross between a low-spine *Gasterosteus* and a high-spine  
281 *Gasterosteus*, and tissues were isolated from up to seven indicated locations (DS1, DS2, DS3 (if  
282 present), Pter, DSL, DF, AF) to measure allele-specific gene expression in the fin fold stage. Note  
283 DS3 only developed in some F1 progeny, so this location has fewer samples (n=6 for DS3; n=18  
284 for all other tissues). **B.** The box plots show ratios of high- to low-spine allele expression at each  
285 of three *HOXDB* genes. The y-axis is the log<sub>2</sub> of the high-spine versus low-spine read ratio at a  
286 SNV (black line: equal expression at log<sub>2</sub> ratio of 0). The x-axis shows the seven tissues collected  
287 from fin-fold stage fish arranged from anterior to posterior, as well as the sample collected from  
288 earlier whole embryos (Embryo). SNVs scored for each dorsal tissue compared to the anal fin:  
289 *HOXD11B*, chrVI:17756571; *HOXD9B*, chrVI:17764664; and *HOXD4B*, chrVI:17783616  
290 (*gasAcu1-4*). \*\*\* indicates that  $p \leq 1E-6$  and \*\* indicates  $p \leq 1E-3$  by Mann Whitney U test. All  
291 alleles with 0 reads have been replaced with 0.5 for graphical representation purposes and  
292 statistical analysis.

293

294 ***HOXDB* is associated with dorsal spine number and length in *Apeltes quadracus***

295 To determine if other stickleback genera use the same locus to control dorsal spine patterning, we  
296 conducted an association mapping study in *Apeltes quadracus*. As their scientific species name  
297 suggests, *Apeltes* “*quadracus*” typically has four dorsal spines. However, multiple populations in  
298 the maritime provinces of Canada have previously been identified that show a high incidence of  
299 either low- or high-spine fish (Blouw and Hagen, 1984a) (see Figures 5 and S5 for further details  
300 of anatomy). The *Apeltes* spine number differences are heritable and correlated with ecological  
301 conditions across different geographic locations (Blouw, 1982; Hagen and Blouw, 1983). We  
302 sampled from two populations in Nova Scotia, one (Louisbourg Fortress) with predominantly five  
303 dorsal spines (range from three to six, Figure 5A), and one (Tidnish River 3) with predominantly  
304 four dorsal spines (range from two to six). Approximately equal numbers of low-spine (two to four  
305 spines) and high-spine (five to six spines) individuals were genotyped across the *HOXDB* locus  
306 (Louisbourg Fortress n=211 total, 1 three-spine, 104 four-spine, 99 five-spine, 7 six-spine; Tidnish  
307 River n=121 total, 1 two-spine, 1 three-spine, 59 four-spine, 59 five-spine, 1 six-spine). A highly

308 significant association was seen between spine number in wild fish and the genotypes at two  
309 markers located between *HOXD9B* and *HOXD11B* (Figure 5B, Black line). At the peak marker  
310 (*AQ-HOXDB\_6*), fish homozygous for the AA allele had an average of 5.1 spines (SD = 0.4) while  
311 fish homozygous for the GG allele had an average of 4.2 spines (SD=0.5).

312 To test whether, as in *Gasterosteus*, the *Apeltes HOXDB* cluster is also associated with changes in  
313 lengths as well as numbers of spines, we measured the length of the individual dorsal spines and  
314 anal spines in the Louisbourg Fortress fish. The spines were numbered similarly to *Gasterosteus*,  
315 with a three-spine *Apeltes* having from anterior to posterior DS1, DS2, and DSL, and a six-spine  
316 *Apeltes* having DS1, DS2, DS3, DS4, DS5, and DSL (Figure S5A). Comparing spine lengths and  
317 genotypes showed the DS3 length was strongly associated with the genotypes in the *HOXDB*  
318 region (Figure 5B, blue line), but the other spines lengths were not (Figure S5). The genotype at  
319 the peak marker in the *HOXDB* cluster (*AQ-HOXDB\_6*) explained 22% of the overall variance in  
320 DS3 length of wild-caught fish.

321 The minimal genomic interval that was shared by both the spine number and spine length  
322 associations was approximately ~2kb, including *HOXD11B* exon 3 and part of the intergenic  
323 region between *HOXD9B* and *HOXD11B* (Figure 5B). Based on whole genome DNA sequencing  
324 from Louisbourg (n=2) and RNA-sequencing data (n=14) (see methods sections: *Apeltes* genome  
325 and assembly and RNA-sequencing), no sequence variation was found in the protein-coding  
326 regions of *HOXD11B* or *HOXD9B*. The peak marker for both spine number and length associations  
327 was a change of two adjacent base pairs from GG to AA in the intergenic region. Together, these  
328 results suggest that the increased spine number and increased DS3 length in some *Apeltes* likely  
329 arise from a regulatory difference that maps in the non-coding interval between *HOXD9B* and  
330 *HOXD11B*.

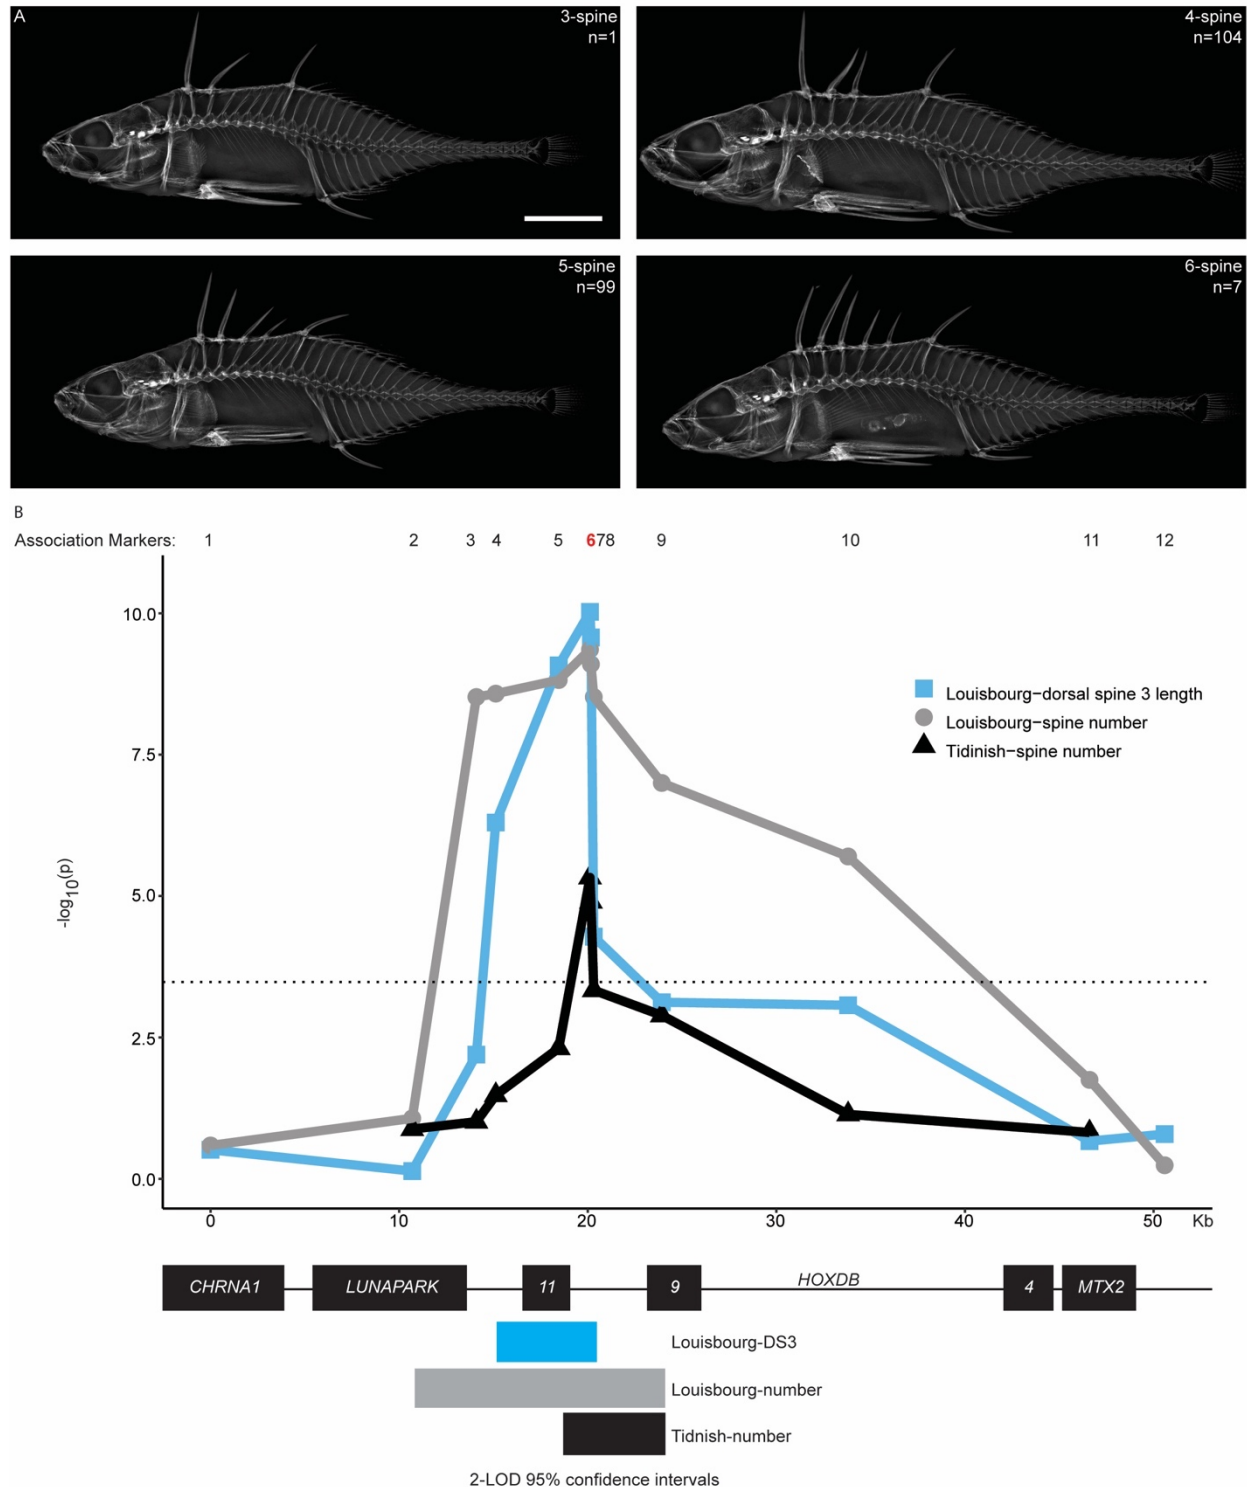

331

332 **Figure 5. Spine number and dorsal spine 3 (DS3) length are associated with the *HOXDB***  
 333 **locus in *Apeltes quadracus*.** **A.** X-rays of *Apeltes quadracus* from Louisbourg Fortress with three  
 334 to six dorsal spines. Scale bar is 5 mm. **B.** Association mapping of *Apeltes quadracus* from  
 335 Louisbourg Fortress (n=211; n=1 three-spine, n=104 four-spine, n=99 five-spine, n=7 six-spine)  
 336 and Tidnish River 3 (n=121; n=1 six-spine, n=59 five-spine, n=59 four-spine, n=1 three-spine, n=1

337 two-spine). Both populations show a significant association between spine number and the  
338 *HOXDB* locus. *Apeltes quadracus* from Louisbourg Fortress were also phenotyped for dorsal spine  
339 length and show a significant association between DS3 length and the *HOXDB* cluster. The  
340 markers used are displayed across the top (1-12), and the peak marker (6) is highlighted in red.  
341 The dotted line represents the Bonferroni corrected significance threshold at  $\alpha = 0.05$ . The 95%  
342 confidence intervals (2-LOD) for spine number are denoted by the bars on the bottom (gray for  
343 Louisbourg, black for Tidnish). The overlapping 95% confidence interval for spine number is  
344 ~5750 bp from the third exon of *HOXD11B* to the first exon of *HOXD9B*. The smallest interval  
345 shared by both spine number and spine length intervals is ~2kb including *HOXD11B* exon 3 and  
346 part of the intergenic region between *HOXD9B* and *HOXD11B*. Additional anatomical details and  
347 association plots for other spine lengths are shown in Figure S5.

### 348 *Apeltes HOXDB* genes show *cis*-regulatory differences in spine expression

349 To further test for possible *cis*-acting regulatory differences in *Apeltes HOXDB* genes, we  
350 generated F1 hybrids carrying contrasting *Apeltes* haplotypes in the key genomic interval and  
351 carried out RNA-sequencing on the spines, blank pterygiophore, and dorsal and anal fins at the fin  
352 fold stage (Figure 6A). While there were no sequence differences in the protein coding portions of  
353 the *HOXDB* genes, the 3' UTRs of *HOXD9B* and *HOXD11B* had variants that could be used to  
354 determine the expression level coming from the genotypes associated with low-spine (L) or high-  
355 spine number (H) in the association study (Figure 6B). In F1 fish carrying one L-haplotype and  
356 one H-haplotype, significantly higher expression was seen from the *HOXD9B* and *HOXD11B*  
357 genes of the L-haplotype (Figure 6C). The difference was most pronounced and statistically  
358 significant in DS3, the same spine whose overall length was associated with genotypes in the  
359 *Apeltes HOXDB* region (DS3:*HOXD9B* (chr06:16028519)  $p=3E-7$ ; *HOXD11B* (chr06:16020516)  
360  $p=9E-4$  (Fisher's Exact Test)).

361  
362 Some of the F1 fish generated for the allele-specific expression experiment carried both an H  
363 haplotype and a recombinant haplotype that we termed the low-high-recombinant (LHR)  
364 haplotype (Figure 6B). These fish showed an allele-specific expression pattern similar to the one  
365 observed in fish heterozygous for an H and L haplotype (Figure 6D), with more expression of  
366 *HOXD9B* and *HOXD11B* coming from the LHR haplotype (DS3: *HOXD9B* (chr06:16027923)  $p=$   
367  $9E-8$ ; *HOXD11B* (chr06:16020516)  $p=1E-03$  (Fisher's Exact Test)). In contrast, fish heterozygous  
368 for the LHR and L haplotypes showed no significant difference between the *HOXD9B* expression  
369 patterns (DS3: *HOXD9B* (chr06:16027923)  $p=0.08$ , *HOXD11B* was not scored due to a lack of  
370 distinguishing markers between LHR and L) (Figure 6E). Thus, at a gene expression level, the  
371 LHR haplotype behaved more like the L haplotype than the H haplotype. Similarly, at the  
372 phenotypic level, F1 individuals heterozygous for the L and LHR haplotypes typically had low  
373 spine numbers, resembling fish homozygous for the L haplotype, while fish homozygous for the  
374 H haplotypes had higher spine numbers (L/L fish: 16/16 with three or four spines; L/LHR fish:  
375 15/18 with three or four spines, 3/18 with five spines; H/H fish: 16/16 with five or six spines).  
376 These results suggest the key genomic interval controlling both gene expression differences and  
377 phenotypic differences between the L/LHR and H haplotypes maps to the minimal ~5 kb region  
378 shared between the L and LHR haplotypes (pink region on the left side of Figure 6B).

379  
380



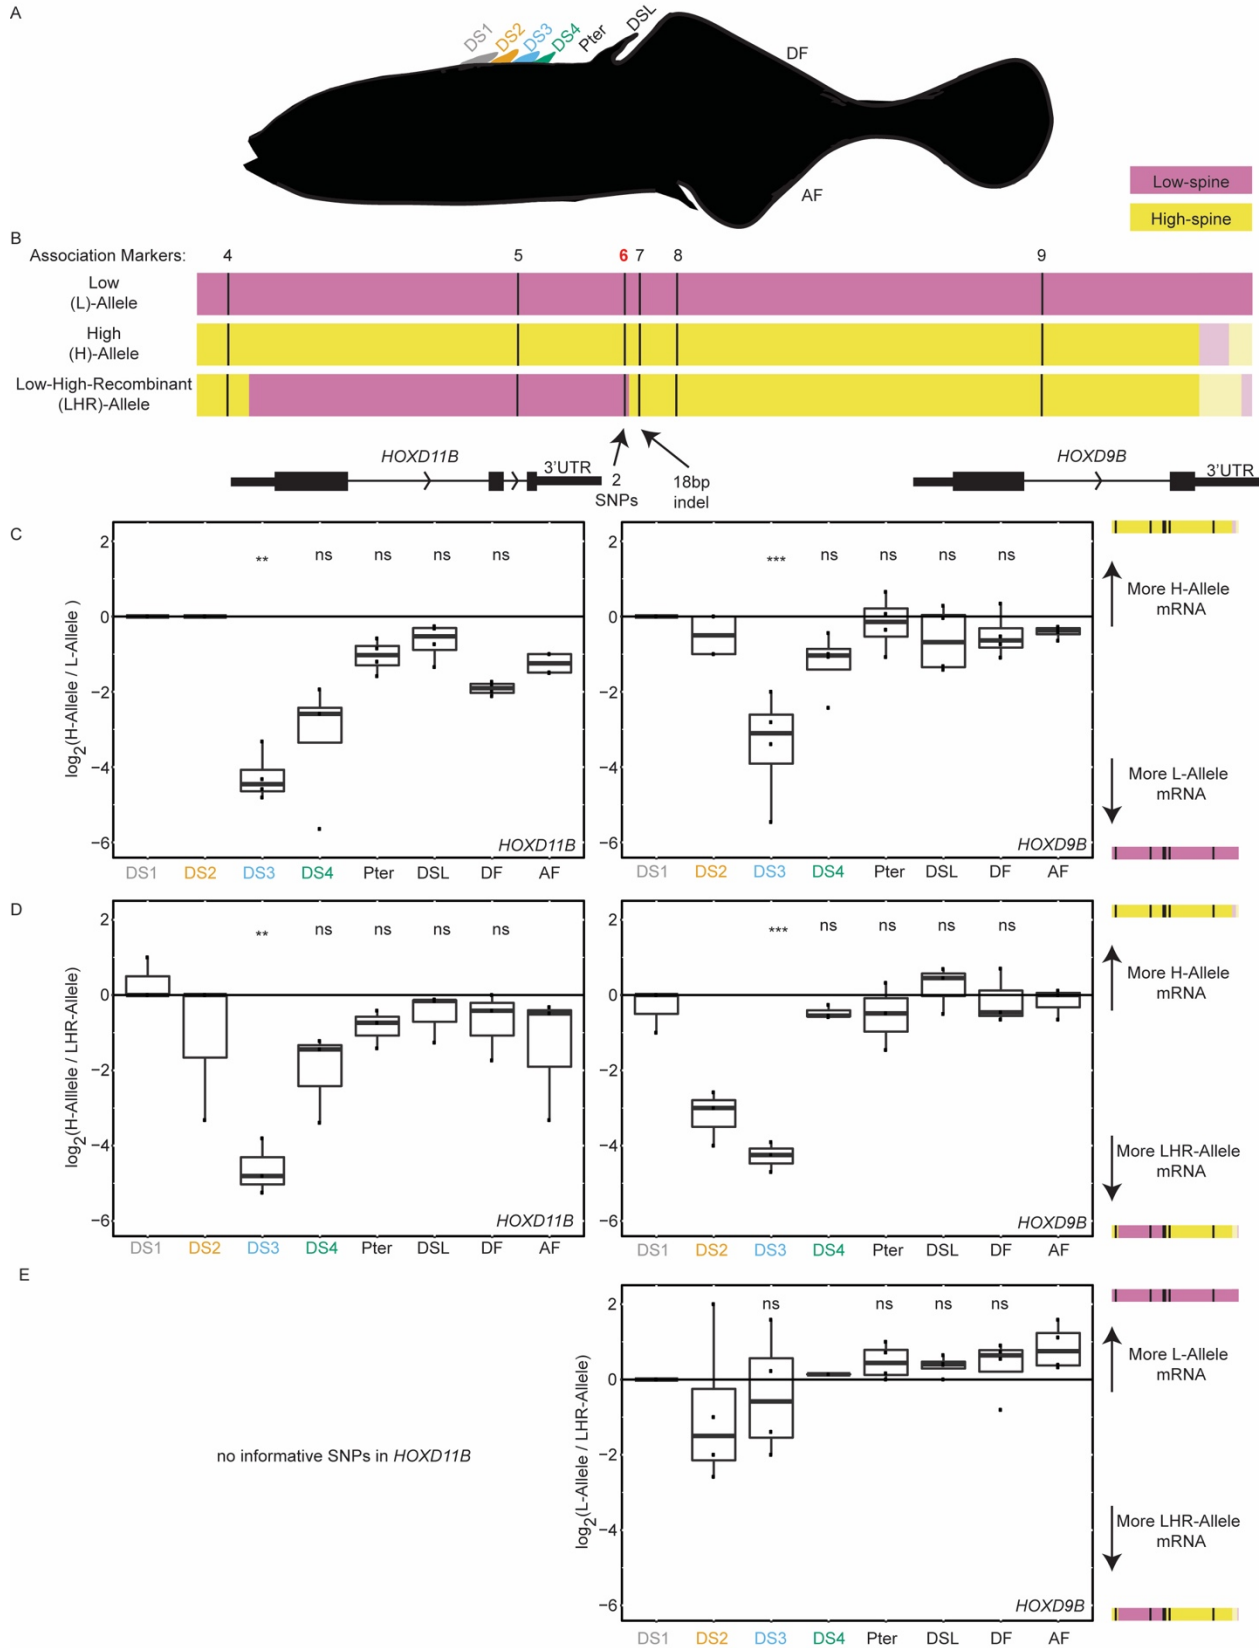

382 **Figure 6. *HOXDB* genes show *cis*-acting expression differences in *Apeltes* spines. A.** Outline  
383 of *Apeltes* fin fold stage fry. Tissues were isolated from up to eight indicated locations (DS1, DS2,  
384 DS3, DS4, Pter, DSL, DF, AF) to measure allele-specific gene expression in the fin fold stage.  
385 DS4 only developed in some F1 progeny, so this location has fewer samples. **B.** Schematics  
386 showing the three *HOXDB* haplotypes that segregate in the allele-specific expression cross. Black  
387 lines indicate the position of association mapping markers used to identify the haplotypes. Pink  
388 indicates regions where genotypes match those associated with low-spine phenotypes in the  
389 association analysis (Figure 5B). Yellow indicates regions where genotypes match those  
390 associated with high-spine phenotypes in the association analysis. Lighter shading on the right  
391 indicates regions where marker association is not known, but DNA sequence differences are shared  
392 between haplotypes of the same color. **C.** Box plots showing the allele-specific expression ratios  
393 in all the tissues dissected at fin fold stage from F1 fish heterozygous for H and L haplotypes.  
394 Reads from DS3, DS4, Pter, DSL, and DF were compared to reads from AF to determine  
395 significance (by Fisher's Exact Test: *HOXD9B* (chr06: 16028519)  $p=3E-7$ ; *HOXD11B*  
396 (chr06:16020516)  $p=9E-4$ ). DS1 and DS2 were not assessed because the read counts were too low  
397 (Figure S4). **D.** Box plots showing the allele-specific expression ratios in all the tissues dissected  
398 at fin fold stage from fish heterozygous for LHR and H haplotypes. Allele-specific expression was  
399 seen in DS3 when compared to the AF for both *HOXD11B* and *HOXD9B* (by Fisher's Exact Test:  
400 *HOXD9B* (chr06: 16027923)  $p=9E-8$ ; *HOXD11B* (chr06:16020516)  $p=1E-3$ ). **E.** Box plot  
401 showing the allele-specific expression ratios in all the tissues dissected at fin fold stage from F1  
402 fish heterozygous an L and LHR haplotypes (by Fisher's Exact Test in DS3: *HOXD9B* (chr06:  
403 16027923)  $p=0.08$ ). Only *HOXD9B* is shown because there were no informative SNPs in  
404 *HOXD11B* between the L and LHR haplotypes. \*\*  $p \leq 1E-3$  \*\*\*  $p \leq 1E-6$ .

#### 405 406 **Identification of a spine enhancer and genomic changes in both *Gasterosteus* and *Apeltes***

407  
408 To search for possible *cis*-regulatory sequences contributing to *HOXDB* expression variation, we  
409 looked for conserved non-coding sequences and open chromatin domains located in the minimal  
410 interval defined by the association (Figures 1 and 5) and gene expression studies (Figures 4 and  
411 6). This identified one ~500 bp region (Figure 7A) found in both *Apeltes* and *Gasterosteus* that is  
412 conserved by phastCons alignment to Tetraodon, Medaka, and Fugu (Siepel et al., 2005). This  
413 small conserved region contained the peak scoring marker in the *Apeltes* association study (two  
414 adjacent base pairs changed from GG to AA). This conserved non-coding region also corresponds  
415 to a region of open chromatin in medaka embryos at stages equivalent to those where we see  
416 *HOXDB* expression in sticklebacks by *in situ* hybridization (Marlétaz et al., 2018).

417  
418 We cloned the *Apeltes* region from both the L and H haplotypes (611 bp in L; 587 bp in H) and  
419 tested whether the sequence could drive GFP reporter gene expression in transgenic enhancer  
420 assays. Because *Apeltes* fish have very small clutch sizes, constructs were injected into  
421 *Gasterosteus* embryos to obtain sufficient transgenic embryos for analysis. The ~600 bp non-  
422 coding constructs both drove expression at embryonic time points in the tail of transgenic embryos  
423 in a similar pattern to that seen in the *in situ* hybridizations for *HOXD9B* and *HOXD11B* (Figure  
424 7B, left). At later time points, the conserved non-coding regions drove expression in all of the fins  
425 (dorsal, caudal, anal), all of the spines (dorsal spines and pelvic spines), and the posterior portion  
426 of the fish (Figure 7B, right). Similar patterns were driven by both the L- and H-type *Apeltes*  
427 constructs, though we note that differences in both strength and patterns of expression can be

428 difficult to detect in mosaic transgenic fish resulting from random *Tol2* integration (L 611 bp  
429 region: n=22 transgenics with bilateral green eyes; n=6/22 pectoral fin, n=8/22 pelvis, n=9/22  
430 dorsal spines, n=11/22 dorsal fin, n=9/22 anal fin, n=10/22 posterior muscle; H 587 bp region:  
431 n=19 with bilateral green eyes; n=2/19 pectoral fin, n=4/19 pelvis, n=9/19 dorsal spines, n=11/19  
432 dorsal fin, n=11/19 anal fin, n=10/19 posterior muscle). Given the consistent expression patterns  
433 seen in both tail buds and later axial structures of transgenic fish, we refer to the ~600 bp conserved  
434 intergenic sequence as an axial enhancer (*AxE*) of the *HOXD9B* locus.

435  
436 Although *AxE* sequences are conserved between *Apeltes* and typical *Gasterosteus*, we were unable  
437 to amplify the *AxE* region from the Boulton high-spine allele identified in the *Gasterosteus* QTL  
438 cross. We therefore used PacBio long-read sequencing to identify the intergenic region between  
439 *HOXD9B* and *HOXD11B* from the *Gasterosteus* Boulton high-spine allele. The sequenced region  
440 shows major structural changes, including a deletion which removes almost all of the *AxE* enhancer,  
441 and the presence of two transposable elements not present in the low-spine reference genome from  
442 Bear Paw Lake ((Jones et al., 2012b) Alaska, USA) fish: a LINE (L2-5\_GA) element and an  
443 endogenous retrovirus (ERV1-6\_GA-I) (Figure 7A). The LINE element is approximately 1 kb and  
444 also appears to be present in some additional stickleback populations in the Pacific Northwest  
445 (sequencing data from (Roberts Kingman et al., 2021b)). When the LINE element was detected in  
446 other populations, it was not associated with the deletion of the *AxE* sequence as seen in Boulton  
447 Lake. The endogenous retrovirus insertion was approximately 11 kb containing open reading  
448 frames for an envelope and gag-pol proteins, flanked by ~1 kb long terminal repeats (LTRs).  
449 Junction sequences for this retroviral insertion near *AxE* were not found in the sequenced genomes  
450 of over 200 other sticklebacks from different populations (Jones et al., 2012b; Roberts Kingman  
451 et al., 2021b). The Boulton high-spine allele thus shows both the nearly complete loss of *AxE* and  
452 the addition of new sequences in the region.

453  
454 To determine if loss of the *AxE* sequence alone was sufficient to recapitulate the phenotypic effect  
455 of a higher spine number and shorter DS2 length in *Gasterosteus*, we deleted the region in low-  
456 spine *Gasterosteus* using CRISPR targeting. In mosaic F0 founder fish, no significant effects on  
457 spine number were detected. However, DSL and AS were both significantly longer in the F0  
458 injected mutants compared to their control siblings (two-tailed t-test; DSL p=7E-05, AS p=0.004  
459 n=32 control and n=24 injected) (Figure S7). Both the particular spines affected and the direction  
460 of phenotypic effects resembled the phenotypes seen when targeting the *HOXD11B* protein-coding  
461 region. These results suggest that the *AxE* region is required for normal spine length patterning in  
462 *Gasterosteus*, but that additional sequence changes likely contribute to the spine number  
463 phenotypes linked to the region.

464

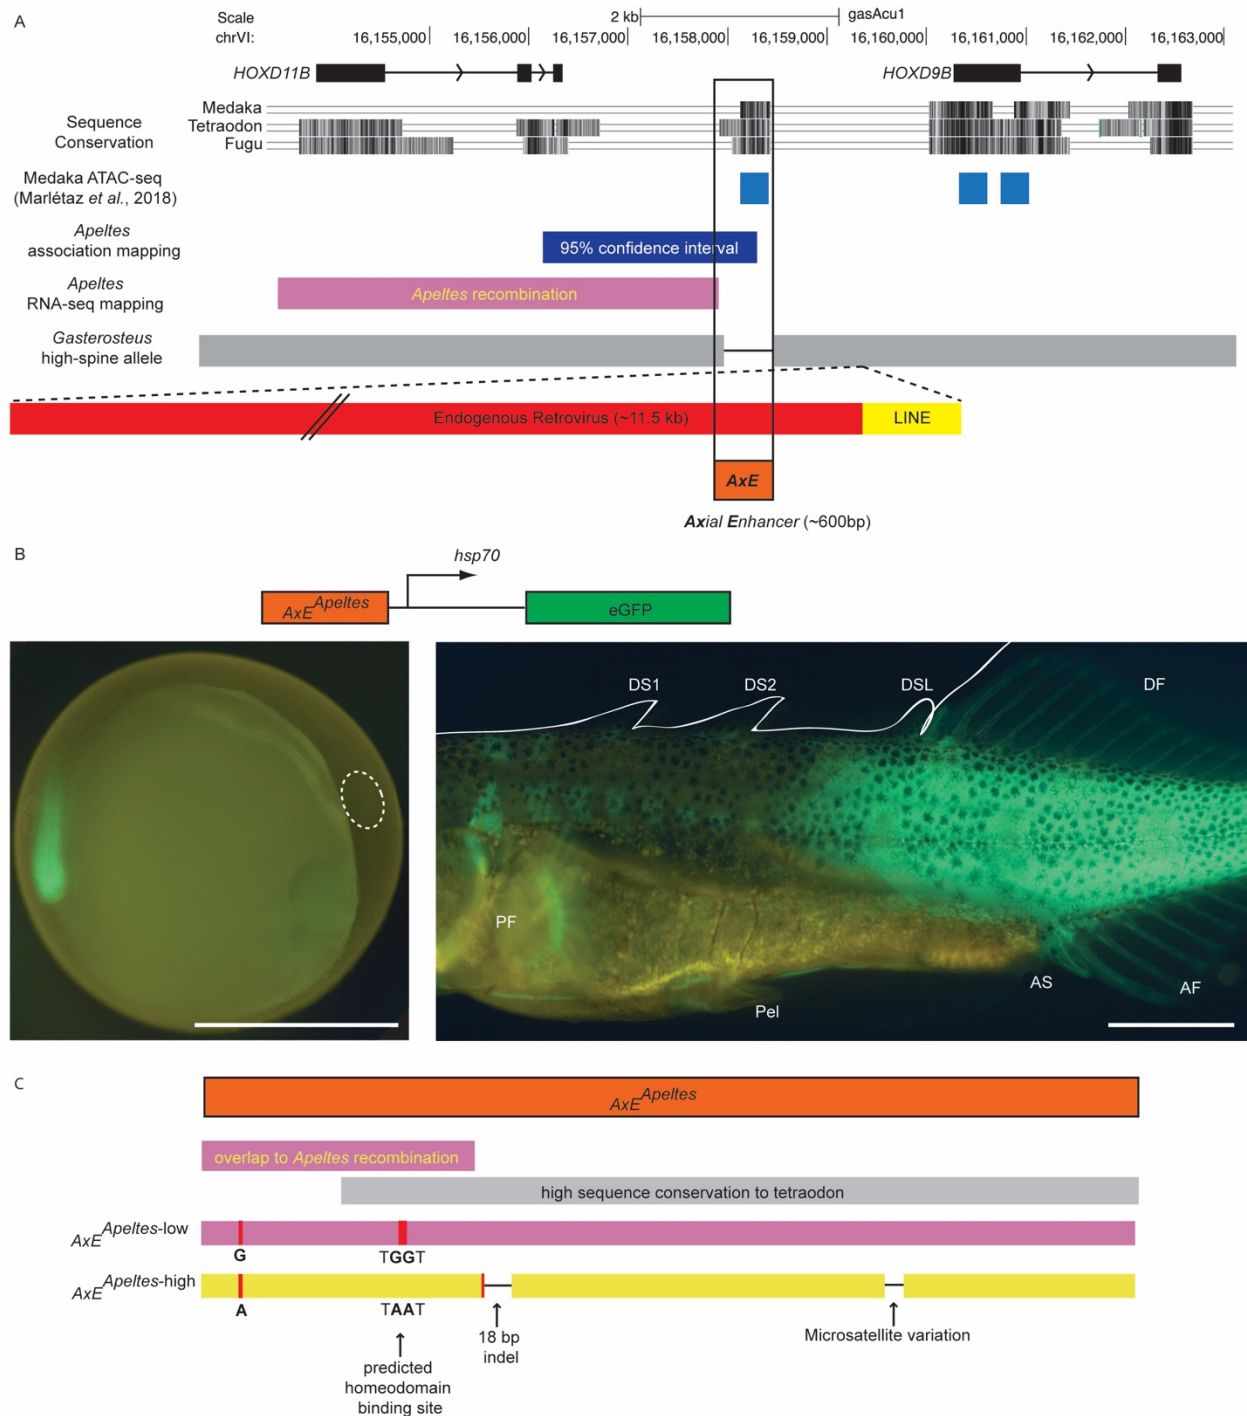

465  
466

467 **Figure 7. The genomic region between *HOXD11B* and *HOXD9B* contains a conserved axial**  
 468 **enhancer showing sequence changes in both *Gasterosteus* and *Apeltes*.** **A.** The exons of  
 469 *HOXD11B* and *HOXD9B* are shown in *Gasterosteus* (gasAcu1) genomic coordinates. Sequence  
 470 Conservation: phastCons conserved sequence regions identified in exons and in a ~500 bp  
 471 intergenic region from comparisons between fish genomes. The conserved non-coding region  
 472 overlaps an ATAC-seq peak from Medaka embryonic stage 19 (Marlétaz *et al.*, 2018) and partially  
 473 overlaps the genomic intervals defined by spine phenotype and RNA-expression changes in



474 *Apeltes*. In high-spine *Gasterosteus*, the conserved region is deleted (as indicated by a black line  
475 between the two gray boxes), and an endogenous retrovirus and LINE sequence are inserted  
476 (drawn in red and yellow, respectively). **B.** ~600 bp regions from low-spine and high-spine *Apeltes*  
477 were cloned into a *Tol2* GFP expression construct and injected into *Gasterosteus* embryos. Both  
478 versions drove expression in the tail bud of embryos (left), and the fin fold, spines, and dorsal,  
479 anal, and caudal fins of stage 31 fry (right), confirming the region acts as an enhancer. Scale bar  
480 is 1 mm. **C.** There are four sequence differences in the *AxE* region of high- and low-spine *Apeltes*  
481 alleles: one microsatellite variation, an 18bp indel, a SNP, and two adjacent SNPs. Only the single  
482 and the two adjacent SNPs are within the region implicated by *Apeltes* recombination and RNA-  
483 sequencing differences (pink bar).  
484

## 485 **Discussion**

486 Vigorous historical debates have existed about whether mutations in homeotic genes are the likely  
487 basis of common morphological changes seen in wild animals. Most laboratory or human-selected  
488 mutations in the genes are deleterious. In addition, transposable element insertions are strikingly  
489 depleted at *Hox* loci, an effect attributed to the likely deleterious consequences of making  
490 substantial regulatory changes in genes essential for development and survival (Lander et al., 2001;  
491 Simons et al., 2006). On the other hand, the diversity of *Hox* cluster number, composition, and  
492 expression patterns, and the powerful effects of *Hox* genes on many phenotypes in laboratory  
493 models, have made the genes often-cited candidates for the possible molecular basis of obvious  
494 phenotypic differences between wild species, including in sticklebacks (Ahn and Gibson, 1999b,  
495 1999a). *Cis*-acting regulatory differences at *Hox* loci clearly underlie evolutionary differences in  
496 trichome and pigmentation patterns in insects, but the underlying molecular changes are still not  
497 known (Stern, 1998; Tian et al., 2019). Our studies show that independent regulatory changes have  
498 occurred in the *HOXDB* locus of *Gasterosteus* and *Apeltes*, providing a compelling example of  
499 *cis*-acting variation in *Hox* genes linked to the evolution of novel adaptive axial skeletal patterns  
500 in wild vertebrate species.  
501

### 502 **Adaptive significance of dorsal spine number and length**

503  
504 Dorsal spines in sticklebacks play an important role in predator defense. Long spines increase the  
505 effective cross-sectional diameter of sticklebacks (Reimchen, 1983) and can provide a survival  
506 advantage against gape-limited predators (Hoogland et al., 1956). Prominent spines also provide  
507 holdfasts for grappling insect predators and may therefore increase the risk of predation by  
508 macroinvertebrates (Marchinko, 2009; Reimchen, 1980). Different predation regimes may thus  
509 favor either increased or decreased spine lengths and numbers. The intensity of bird, fish, and  
510 insect predation varies across locations, years, and seasons, contributing to a range of different  
511 spine phenotypes in natural stickleback populations (Reimchen and Nosil, 2002; Reimchen et al.,  
512 2013).  
513

514 In *Gasterosteus*, fish with four dorsal spines are found at high frequency in a few populations in  
515 Alaska and Massachusetts (Bell and Baumgartner, 1984; Bell et al., 1985), though ecological  
516 factors acting in these populations are not well characterized. In contrast, Boulton Lake is an  
517 extensively studied population where fish typically show two or three dorsal spines, as well as a

518 high incidence of pelvic spine loss (Reimchen, 1980). Detailed seasonal and longitudinal surveys  
519 have shown that lower spine numbers in Boulton fish are correlated with a higher intensity of  
520 insect predation and higher spine numbers with a higher intensity of bird predation (Reimchen and  
521 Nosil, 2002, 2004). Because fish with four dorsal spines have not been seen in the samples of over  
522 20,000 wild-caught Boulton Lake fish, the occurrence of four-spine sticklebacks in the Boulton  
523 Lake x Bodega Bay F2 laboratory cross appears to be a transgressive phenotype (Rieseberg et al.,  
524 1999) that emerges when Boulton alleles are inherited on a mixed genetic background. We note,  
525 however, that the Boulton *HOXDB* region is also linked to shortening of DS2 in the QTL cross.  
526 Boulton Lake fish have shorter dorsal spines than marine fish, and we hypothesize that the *HOXDB*  
527 allele likely evolved for its contributions to reduced DS2 length in the wild lake population.

528  
529 *Apeltes quadracus* sticklebacks are named for their typical development of four prominent dorsal  
530 spines. However, many wild “*quadracus*” populations in Canada have predominantly three- or  
531 five-spines (Blouw, 1982; Blouw and Hagen, 1984a). In an extensive comparison of *Apeltes* spine  
532 numbers and environmental variables over 570 different locations, Blouw and Hagen found that  
533 increased spine number was correlated with the presence of predatory fish, while decreased spine  
534 number was correlated with both more and denser types of vegetation (Blouw and Hagen, 1984b,  
535 1984c). Spine numbers in both *Apeltes* and *Pungitius* (ninespine stickleback) trend in the same  
536 direction when both stickleback species are present in the same lake, suggesting that the changes  
537 in spine number are selected in response to shared environmental factors, rather than varying  
538 randomly (Blouw and Hagen, 1984d). To further study the possible adaptive value of spine number  
539 differences, Blouw and Hagen exposed mixed populations of four- and five- spine *Apeltes* to  
540 predatory fish and measured differential survival of spine morphs when half of the sticklebacks  
541 had been eaten (Blouw and Hagen, 1984c). When vegetation was present, predation was  
542 nonselective; however, when vegetation was absent, five-spine fish were less likely to be eaten by  
543 perch and trout. Consistent with both the experimental predation experiments and known  
544 ecological correlations, stomachs of wild-caught trout contain more four- than five-spine fish,  
545 while stomachs of great blue herons contained more five- than four-spine fish (Blouw and Hagen,  
546 1984c). Dorsal spines in sticklebacks thus provide an excellent example of a prominent adaptive  
547 structure in vertebrates which evolves in response to different predation regimes in natural  
548 environments and diversifies in part through repeated regulatory changes in *Hox* genes.

## 549 550 ***Hox* genes and dorsal midline skeletal patterns**

551  
552 *Hox* genes are well known for controlling the identity of structures in repeating series, including  
553 body segments in insects, somite fates in vertebrates, digit identities in limbs, and rhombomere  
554 segments in the hindbrain (Carroll et al., 2005). Dorsal spines and pterygiophores represent an  
555 additional series of repeating structures found in fish, and many of the spine changes we see in  
556 sticklebacks are consistent with identity transformations in the dorsal midline. Prior work has  
557 shown that *Hox* phenotypes are often governed by the rule of posterior prevalence, where the  
558 posterior-most, highest-numbered *Hox* gene that is expressed in a given region generally controls  
559 the fate of that region (Durstion, 2012). Therefore, when posterior genes expand in expression, the  
560 regions with expanded expression generally acquire a more posterior fate. Conversely, when  
561 activity of a *Hox* gene is lost from a region, that region typically acquires a more anterior fate.  
562 Because most vertebrates have multiple *Hox* clusters, axial phenotypes are frequently only seen  
563 when multiple or all members of a *Hox* paralogous group (PG) are mutated. For example, when

564 all members of the mouse *Hox* PG9 (*Hoxa9*, *Hoxb9*, *Hoxc9*, *Hoxd9*) are mutated, some of the  
565 normally rib-less lumbar vertebrae develop ribs like thoracic vertebrae (McIntyre et al., 2007).  
566 These vertebrae have thus undergone a homeotic transformation and acquired a more anterior fate.

567  
568 Our RNA sequencing studies show that many different *Hox* genes in both *Gasterosteus* and *Apeltes*  
569 are expressed in the dorsal spines or fins of developing sticklebacks, with the exception of *Hox*  
570 PG1, some *Hox* PG13 genes, and all *HOXBB* cluster genes (Figure S4). As in other systems, lower-  
571 numbered *Hox* genes tend to be expressed at higher levels at more anterior locations, and higher-  
572 numbered genes tend to be expressed at higher levels at more posterior locations. Several *Hox*  
573 genes show strong differential expression across different spines and pterygiophores (including  
574 *HOXDB* genes), suggesting morphological fates in the dorsal midline are likely influenced by the  
575 combined expression of multiple genes.

576  
577 The *Gasterosteus* high-spine allele with expanded expression of all three *HOXDB* genes is  
578 associated with increased spine number and decreased DS2 length. The expanded expression of  
579 *HOXD11B* would be predicted to result in a posteriorization of the regions gaining expression. The  
580 blank pterygiophore acquires a spine bearing fate, consistent with a shift to a more posterior  
581 identity like DSL. The DS2, which is normally the longest, is shortened and thus becomes more  
582 like the last dorsal spine, which is the shortest spine. Conversely, knocking down *HOXD11B*  
583 expression by CRISPR-Cas9 targeting would be predicted to result in anteriorization of structures,  
584 and the increased length of the DSL that we observe is consistent with a shift of DSL to a more  
585 anterior and therefore longer spine fate.

586  
587 The *Apeltes* H-allele that shows reduced *HOXD9B* and *HOXD11B* gene expression in DS3 is  
588 associated with both increased spine number and a longer DS3. The number and length phenotypes  
589 can both be interpreted as transformations to a more anterior fate. In this model, the appearance of  
590 a fifth spine on a normally blank pterygiophore could be explained by partial transformation to a  
591 more anterior, spine-bearing fate (analogous to the appearance of thoracic ribs on anteriorized  
592 lumbar vertebrae in previous mouse experiments). Anterior spines are normally longer than  
593 posterior spines in *Apeltes*, so the increased length of DS3 is also consistent with an anterior  
594 transformation.

595

596

### 597 **Independent sequence changes in *HOXDB* cis-regulatory elements**

598

599 Our allele-specific expression experiments in F1 hybrids show that the changes in *HOXDB*  
600 expression we see in sticklebacks are due to *cis*-acting regulatory differences linked to the *Hox*  
601 genes themselves, rather than the secondary consequence of changes in unknown *trans*-regulatory  
602 factors. The mapping, association, and transgenic experiments have also identified a particular *cis*-  
603 acting enhancer region located between *HOXD9B* and *HOXD11B* that can recapitulate axial  
604 expression patterns and shows independent sequence changes in *Gasterosteus* and *Apeltes* with  
605 different spine numbers. In *Apeltes*, the most likely sequence difference that mediates changes of  
606 *HOXD9B* and *HOXD11B* expression are two adjacent SNPs (marker: AQ-6) in *AxE*. These SNPs  
607 convert a TGGT sequence in the L-allele to TAAT in the H-allele. They represent the peak marker  
608 scored by association mapping and also map within the minimal *cis*-acting recombination interval  
609 that controls H vs. L and LHR expression differences when the contrasting alleles are scored in F1

610 hybrids. Both the TAAT change and a nearby 18 bp indel, which represents the second highest  
611 scoring marker (*AQ-7*) in the association mapping, are found in the high-spine fish of two  
612 populations on opposite coasts (east and west) of Nova Scotia. Repeated evolution of different  
613 five-spine *Apeltes* populations thus likely takes place through a shared underlying molecular  
614 haplotype at the *Hox* locus, rather than independent mutations in these different populations. A  
615 similar process of allele sharing underlies recurrent evolution of a variety of other phenotypic traits  
616 in both sticklebacks and other organisms (Barrett and Schluter, 2008; Colosimo et al., 2005; Martin  
617 and Orgogozo, 2013). We note that the derived TAAT sequence in the *Apeltes* five-spine allele  
618 creates a predicted core binding motif for a homeodomain protein. Previous studies in *Drosophila*  
619 and other organisms have shown that *Hox* genes can autoregulate in positive and negative feedback  
620 loops (Bienz and Tremml, 1988; Delker et al., 2019; Irvine et al., 1993). We hypothesize that the  
621 creation of a new putative homeodomain binding site located between the *HOXD9B* and  
622 *HOXD11B* genes may contribute to the decreased *HOXDB* expression observed with the H-allele.  
623 We note, however, that we have not been able to recapitulate the altered expression patterns using  
624 *AxE* transgenic reporter constructs integrated at random locations in the genome. Because  
625 endogenous *Hox* expression patterns are likely controlled by interactions between multiple long-  
626 distance control elements and surrounding topological domains (Montavon et al., 2011; Spitz et  
627 al., 2003), the most accurate functional tests of the phenotypic effects of particular mutations will  
628 come from scoring those changes at their correct position in the genome. Future advances in  
629 genome editing may eventually make it possible to recreate or revert the TGGT and TAAT  
630 sequence change at the endogenous *HOXDB* locus in sticklebacks and to further test whether these  
631 two adjacent base pair changes are sufficient to alter *Hox* gene expression and spine length or  
632 number.

633  
634 In *Gasterosteus*, the *AxE* enhancer is deleted from the *HOXDB* high-spine allele from Boulton  
635 Lake and has been replaced with two transposable elements, one ERV and one LINE. Removing  
636 the endogenous *AxE* enhancer by CRISPR targeting does not lead to spine number and DS2  
637 phenotypes, but does recapitulate the DSL length changes seen by targeting *HOXD11B* coding  
638 region. The long terminal repeats found in endogenous retroviruses can act as enhancers  
639 (Thompson et al., 2016), and we hypothesize that the additional inserted sequences in the Boulton  
640 allele underlie broader expression in the dorsal spines and the other phenotypic consequences of  
641 the Boulton high-spine allele.

### 642 643 **Repeated use of regulatory changes in morphological evolution**

644  
645 A long-standing question in evolutionary biology is whether the same genetic mechanisms are  
646 used repeatedly to evolve similar traits in different populations and species. Although *Gasterosteus*  
647 and *Apeltes* last shared a common ancestor over 16 million years ago (Kawahara et al., 2009), our  
648 data show that both stickleback groups have made independent *cis*-regulatory changes in the  
649 *HOXDB* region which are linked to new dorsal spine patterns in recently evolved, post-glacial  
650 populations. The types of mutations made in the *AxE* regulatory region are clearly distinct, and the  
651 naturally occurring *Gasterosteus* and *Apeltes* H-alleles lead to contrasting increases and decreases  
652 of *HOXDB* expression. Interestingly, the *HOXD* locus also appears to be used repeatedly during  
653 horn evolution in mammals. The *HOXD* region shows accelerated evolution and insertion of a  
654 novel retroviral element in the diverse clade of species with headgear (horns, antlers, and ossicones,  
655 (Wang et al., 2019)). In addition, rare polycerate (four-horned) variants of sheep and goats have



656 recently been shown to have independent mutations in the *HOXD* locus, ranging from a four base  
657 pair mutation that alters splicing to a large deletion that removes more than 500 kb of sequence  
658 and is lethal when homozygous (Allais-Bonnet et al., 2021; Greyvenstein et al., 2016; Ren et al.,  
659 2016). The fish and mammalian results support a growing body of literature that has found repeated  
660 use of the same loci underlying similar traits, even though the direction of effect of gene expression  
661 and mutational mechanism are often different (Martin and Orgogozo, 2013).

662  
663 While both of our examples of spine variation in recently diverged populations of *Gasterosteus*  
664 and *Apeltes* involve *cis*-regulatory changes, *Hox* coding region mutations may also contribute to  
665 diversification of spine patterns over a wider phylogenetic scale. For example, the *Gasterosteidae*  
666 family can be separated into five different genera of predominantly three-spine, four-spine, five-  
667 spine, nine-spine, and fifteen-spine sticklebacks (*Gasterosteus*, *Apeltes*, *Culaea*, *Pungitius*, and  
668 *Spinachia*, respectively). We note that the coding region of *HOXD11B* shows a high rate of non-  
669 synonymous to synonymous substitutions in comparisons across the stickleback family, and the  
670 dN/dS ratio is greater than 1.0 for comparisons between *Apeltes* and *Gasterosteus* (Figure S6).  
671 This suggests that changes in *HOXD11B* coding regions have likely been under positive selection  
672 during the divergence of *Apeltes* and *Gasterosteus*, perhaps contributing to the distinctive patterns  
673 of spine length and number that are characteristic of these two different genera.

674  
675 Spiny-rayed fish are among the most successful of vertebrates, currently making up nearly a third  
676 of all extant vertebrate species. The lengths and numbers of spines show remarkable diversity  
677 across the Acanthomorpha, including elaborate modifications that have evolved for defense,  
678 camouflage, luring prey, or swimming biomechanics (Wainwright and Longo, 2017). Our results  
679 show that changes in the dorsal spine patterns of wild fish species have evolved in part through  
680 genetic changes in *Hox* genes. Based on the recurrent use of the same *Hox* locus for spine evolution  
681 in different stickleback species, we hypothesize that repeated mutations in *Hox* genes may also  
682 underlie other interesting changes that have evolved in the axial skeletal patterns of many other  
683 wild fish and animal species.

## 684 **Acknowledgements**

685 We would like to thank the Semiahmoo First Nation for allowing us to collect sticklebacks from  
686 the Little Campbell River (British Columbia, Canada). We thank Brian Summers for setting up the  
687 F0 QTL cross, Danielle Desmet for initial measurements of some of the QTL cross fish, Harmony  
688 Folsie for initial testing of CRISPR GFP-knock-in, Abbey Thompson, Ken Thompson, and Dolph  
689 Schluter for help collecting sticklebacks from the Little Campbell River, and Catherine Peichel  
690 and Melanie Hiltbrunner for *G. wheatlandi*, *C. inconstans*, and *S. spinachia* *HOXD11B* sequences.  
691 This work was supported in part by NIH graduate training grant 2T32GM007790 (J.I.W.), pre-  
692 doctoral fellowship from the National Science Foundation (T.R.H., G.A.R.K.), a Stanford  
693 Graduate Fellowship (G.A.R.K.), a Helen Hay Whitney Postdoctoral Fellowship (A.L.H.), NIH  
694 grant R01GM124330 (M.A.B.), and NSERC Discovery Grant RGPIN-2016-04303 (A.C.D.).  
695 David Kingsley is an investigator of the Howard Hughes Medical Institute.

696  
697  
698

699 **Author Contributions**

700 Conceptualization J.I.W., T.R.H., and D.M.K.; Formal Analysis J.I.W. and T.R.H.; Investigation  
701 J.I.W., T.R.H, J.N.A., E.H.A., G.A.R.K., S.D.B., and A.L.H.; Resources T.E.R., M.A.B., C.B.L.,  
702 A.C.D., and D.M.K; Data Curation J.I.W. and T.R.H.; Writing – Original Draft J.I.W. and D.M.K.;  
703 Writing – Review and Editing J.I.W., T.R.H, J.N.A., E.H.A., G.A.R.K., S.D.B., A.L.H., T.E.R.,  
704 M.A.B., C.B.L., A.C.D., and D.M.K.; Visualization J.I.W.; Supervision D.M.K.; Funding  
705 Acquisition C.B.L, A.C.D., and D.M.K

706 **Declaration of Interests**

707  
708 The authors declare no competing interests.  
709  
710

711 **Supplemental Figures**

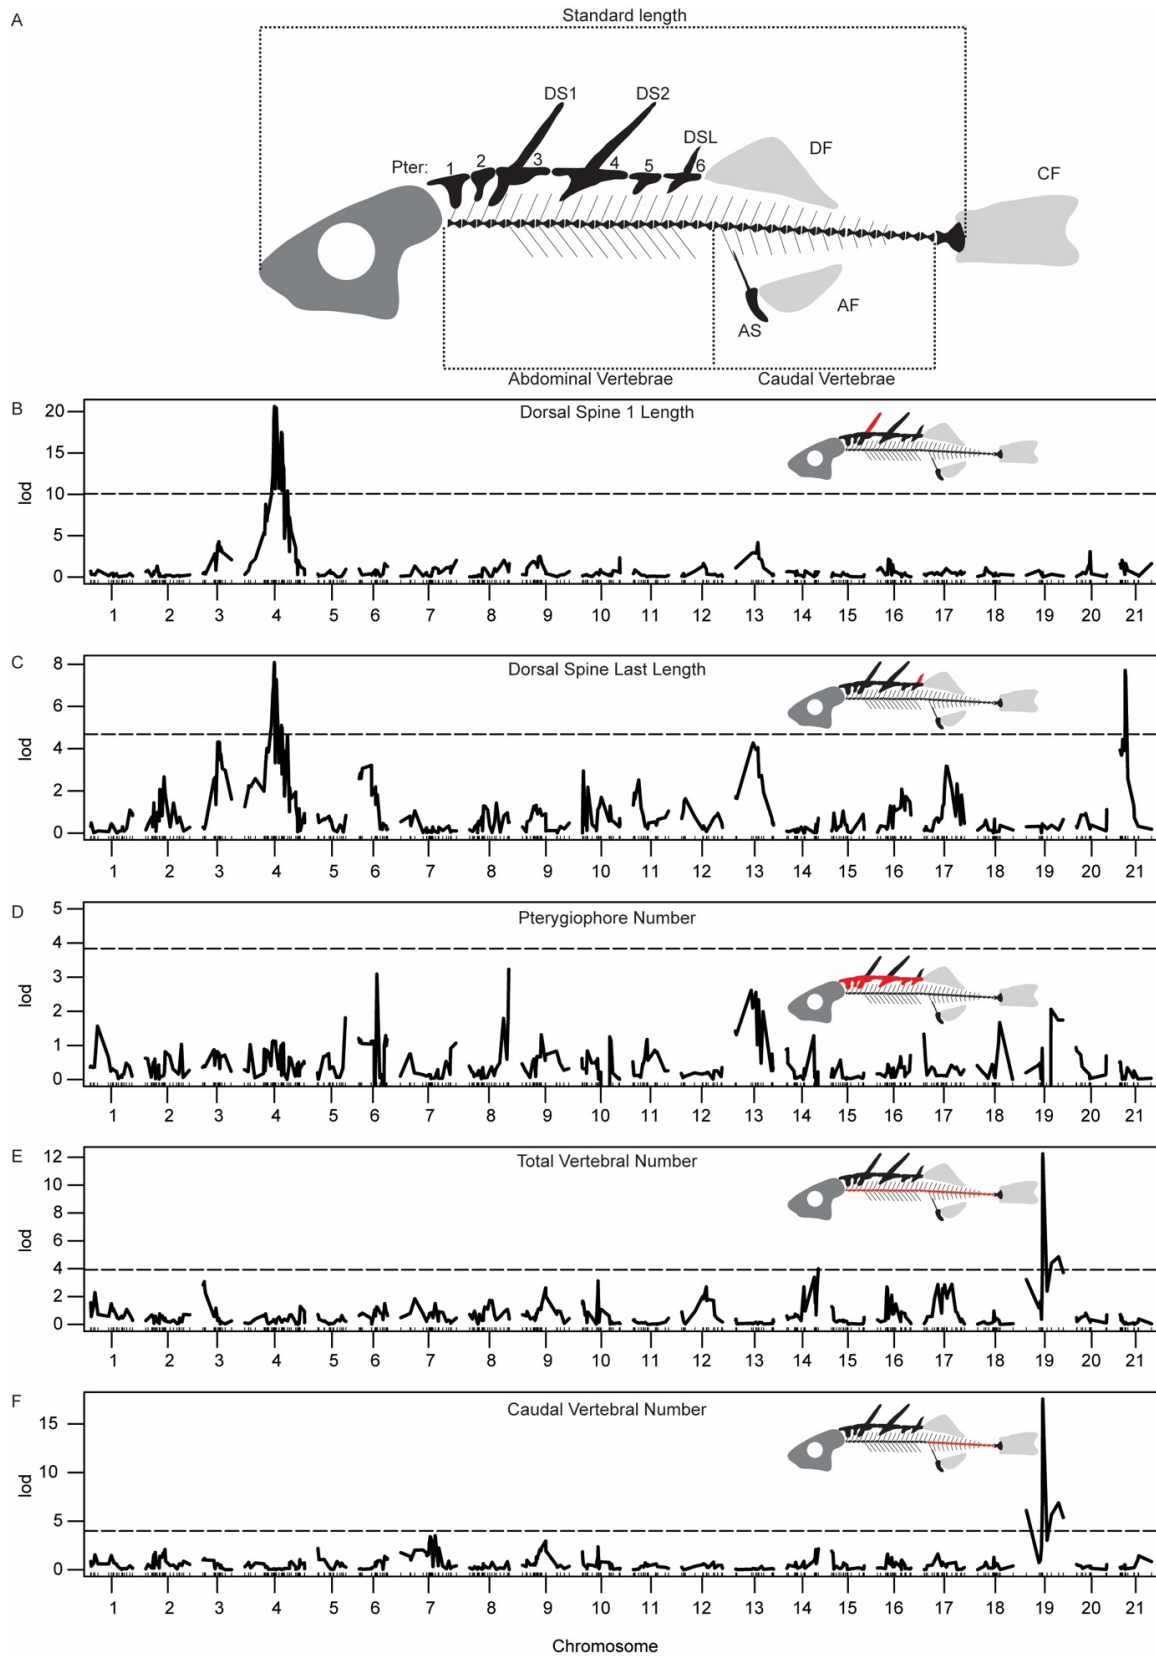

713 **Figure S1. QTL mapping of other spine lengths and axial traits.** **A.** Schematic of *Gasterosteus*  
714 anatomical features. Most *Gasterosteus* have three dorsal spines that in this study are referred to  
715 as dorsal spine 1 (DS1), dorsal spine 2 (DS2), and dorsal spine last (DSL). The dorsal side of the  
716 fish also has median bony plates known as pterygiophores, some of which underlie dorsal spines.  
717 Typical A-P midline pattern: two non-spine bearing/blank pterygiophores (Pter1 and Pter 2), dorsal  
718 spine 1 on pterygiophore 3 (Pter3), dorsal spine 2 on pterygiophore 4 (Pter4), non-spine bearing  
719 pterygiophore 5 (Pter5), and dorsal spine last on pterygiophore 6 (Pter6). The three unpaired fins  
720 are shown in light gray: dorsal fin (DF), caudal fin (CF), and anal fin (AF). The anal spine (AS) is  
721 also indicated on the ventral side of the fish. The standard length shown with the dotted line is  
722 from the anterior tip of the jaw to the posterior of the hypural plates. **B.** QTL plot of DS1 length  
723 **C.** QTL plot of DSL length **D.** QTL plot of pterygiophore number **E.** QTL plot of total vertebral  
724 number **F.** QTL plot of caudal vertebral number. Dotted lines represent genome-wide significance  
725 thresholds. Abdominal vertebral number and anal spine length were also tested, but they did not  
726 result in any peaks that passed the genome wide significance threshold. The significance threshold  
727 (dashed line) is based on LOD scores obtained in 1,000 permutations of the phenotype data ( $\alpha =$   
728 0.05).

729



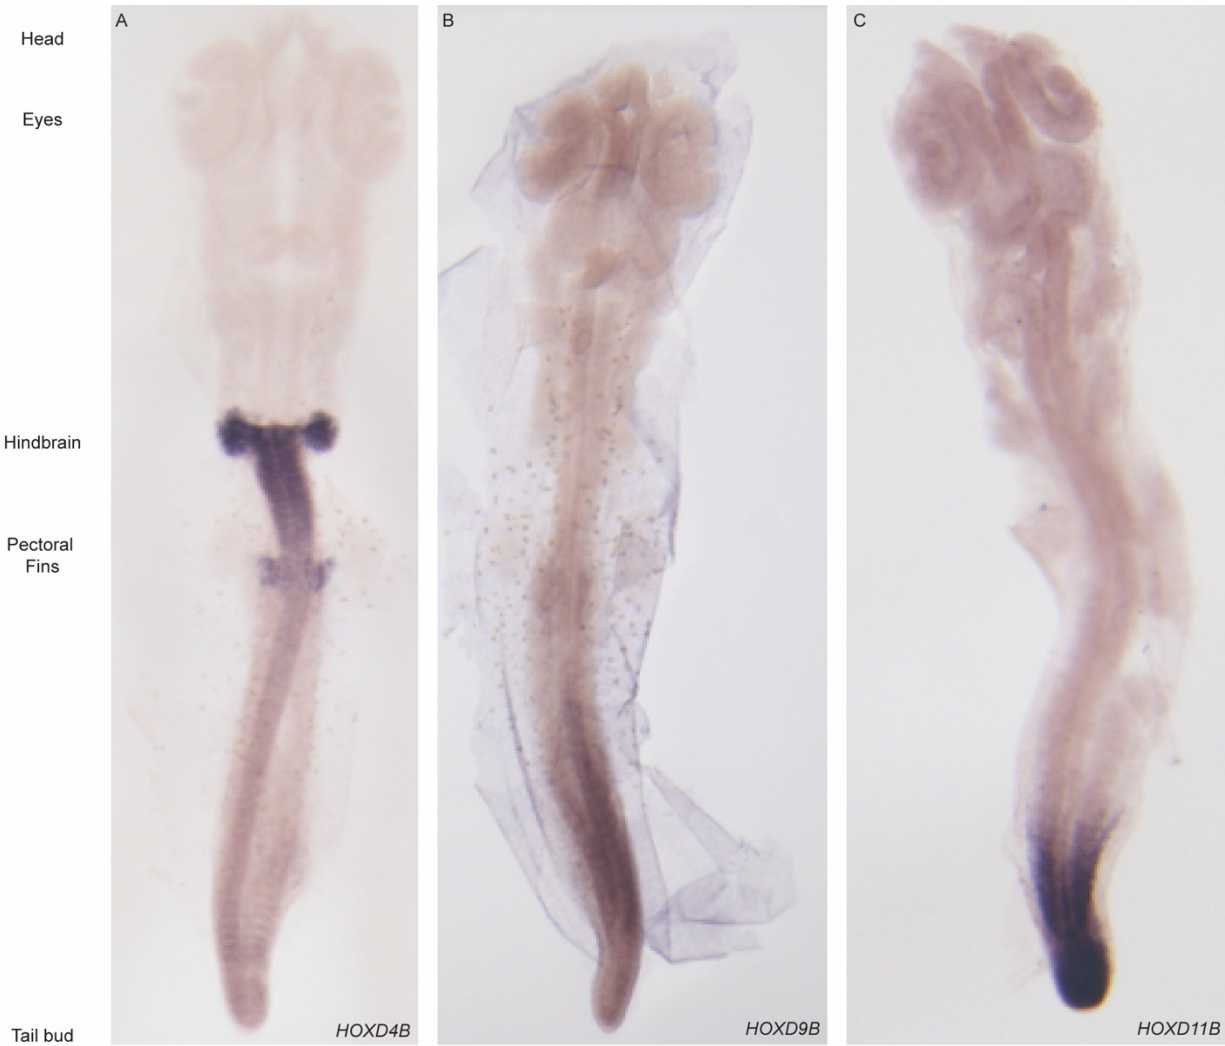

730  
731  
732  
733  
734  
735

**Figure S2. Embryonic expression of *Gasterosteus HOXD* genes.** *In situ* hybridization of *Gasterosteus aculeatus* embryos at Swarup stage 19/20 **A.** *HOXD4B*; **B.** *HOXD9B*; **C.** *HOXD11B*.

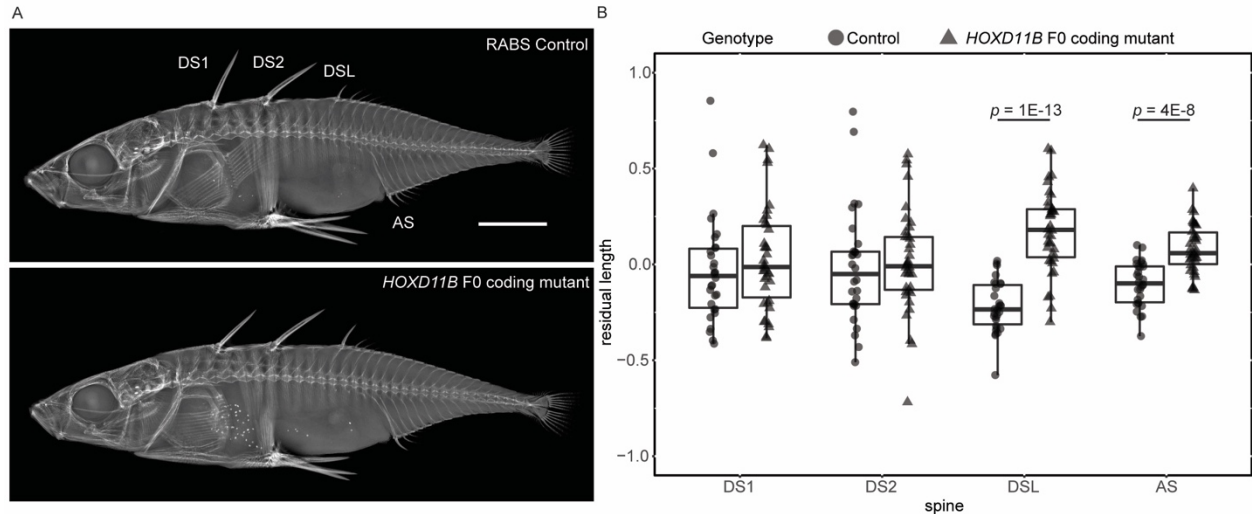

736  
737

738 **Figure S3. Coding mutations in *HOXD11B* cause length changes in *Gasterosteus stickleback***  
739 **spines.** **A.** X-rays of an uninjected sibling control Rabbit Slough (RABS) *Gasterosteus* (top) and  
740 a RABS *Gasterosteus* that was injected at the single cell stage with Cas9 and an sgRNA targeting  
741 the coding region of *HOXD11B* (bottom). Scale bar is 5mm. **B.** Quantification of spine length  
742 changes. DS1 and DS2 were not significantly different between controls and *HOXD11B* mutant  
743 fish. DSL and AS were significantly longer in the F0 mutants compared to the controls (two-tailed  
744 t-test; DSL  $p=1E-13$ , AS  $p=4E-08$ ,  $n= 38$  injected and  $n=30$  control from 3 clutches combined).  
745 The y-axis is the residual after accounting for the standard length of fish.

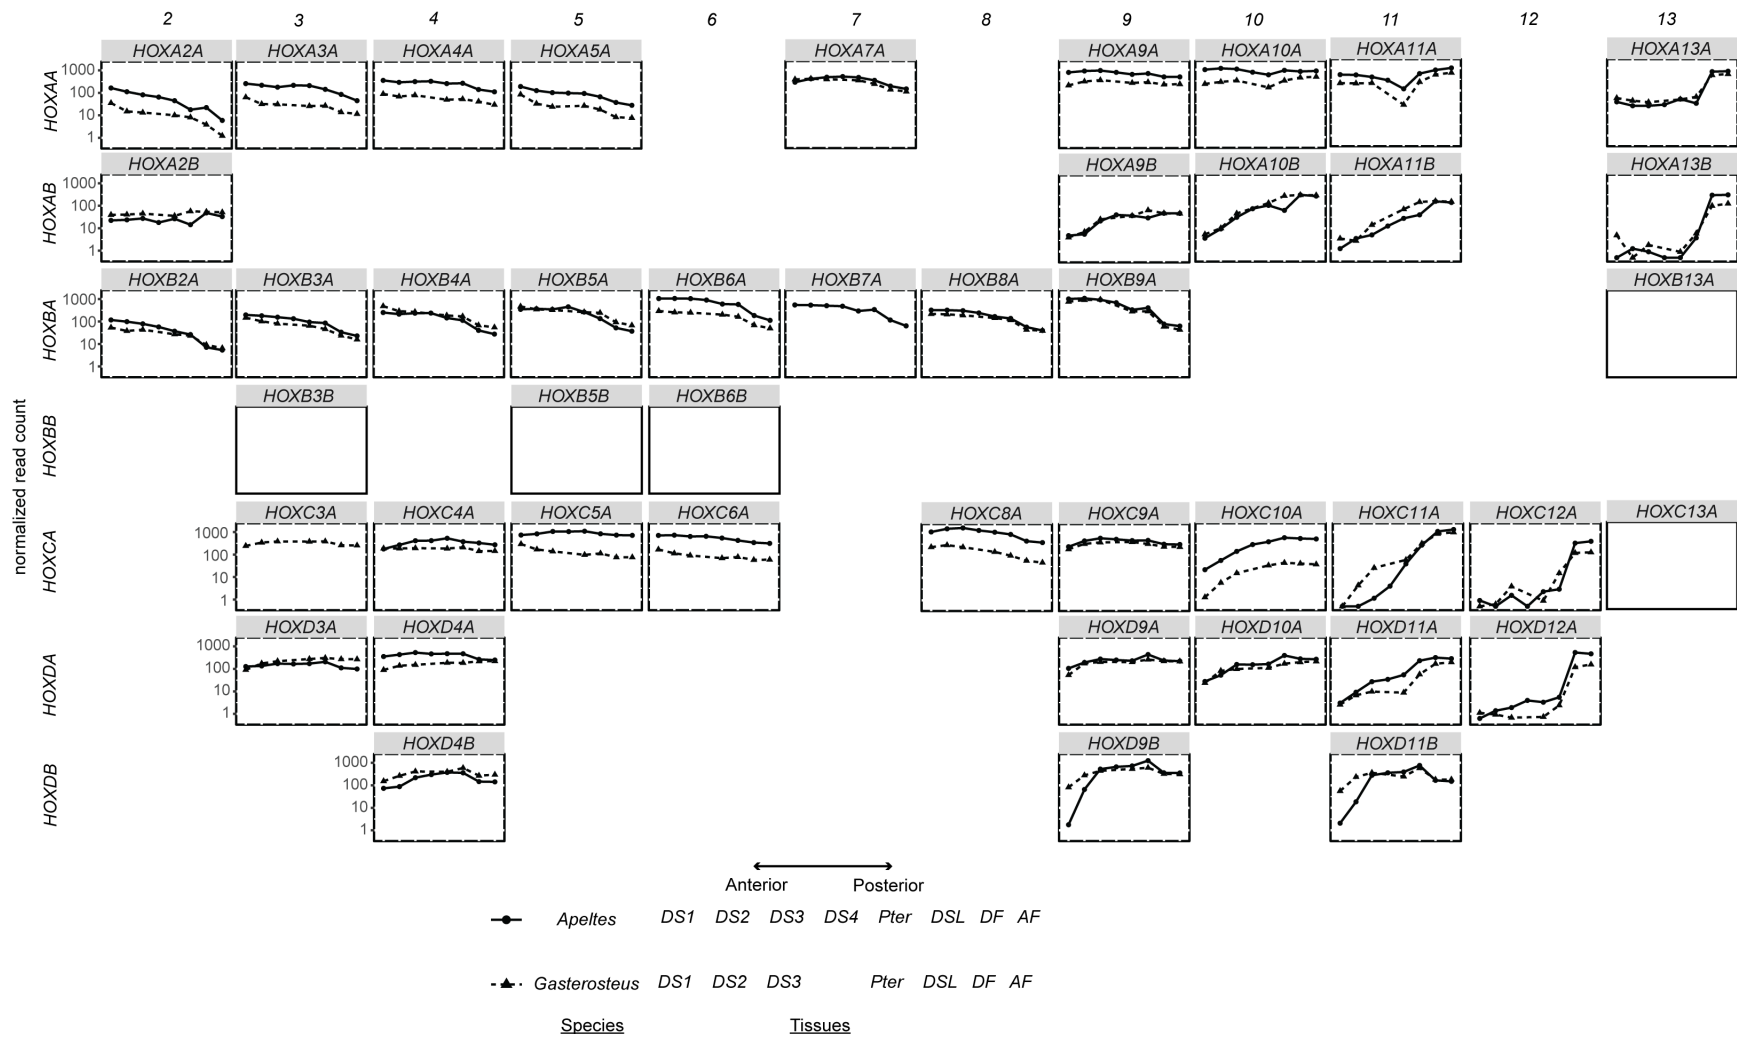

746  
747  
748  
749  
750  
751

**Figure S4. Hox gene expression patterns in *Gasterosteus* and *Apeltes* spines and fins.** The expression patterns for each Hox gene in different stickleback Hox clusters are shown with normalized read count on the y-axis and tissue site on the x-axis. The tissues are organized by position from anterior to posterior along the dorsal side of the fish, with the anal fin at the end. The read count shown is the average across all samples for that species; the reads are normalized within each species but not between species. The genes with

752 empty plots exist in both species but are not expressed in the tissues shown with the exception of *HOXB6B* and *HOXB7A*, which are  
753 located in a gap in the *Gasterosteus* assembly and thus was not scored; *HOXB6B* is not expressed in *Apeltes* but *HOXB7A* is expressed.  
754 *HOXA1A*, *HOXB1B*, and *HOXB1B* are present in the genomes but were not expressed and are not shown. The genes differentially  
755 expressed ( $p_{adj} < 0.01$ ) between the largest anterior spines (DS1 and DS2) in *Gasterosteus* low-spine (three-spine) fish are *HOXA2A*,  
756 *HOXA5A*, *HOXA10B*, *HOXC3A*, *HOXC5A*, *HOXC9A*, *HOXC10A*, *HOXC11A*, *HOXD3A*, *HOXD4A*, *HOXD9A*, *HOXD10A*, *HOXD4B*,  
757 *HOXD9B*, and *HOXD11B*; the genes differentially expressed ( $p_{adj} < 0.01$ ) between DS1 and DS3 in *Apeltes* low-spine (four-spine) fish  
758 are *HOXA10B*, *HOXC4A*, *HOXC8A*, *HOXC9A*, *HOXC10A*, *HOXD9A*, *HOXD10A*, *HOXD11A*, *HOXD4B*, *HOXD9B*, and *HOXD11B*.



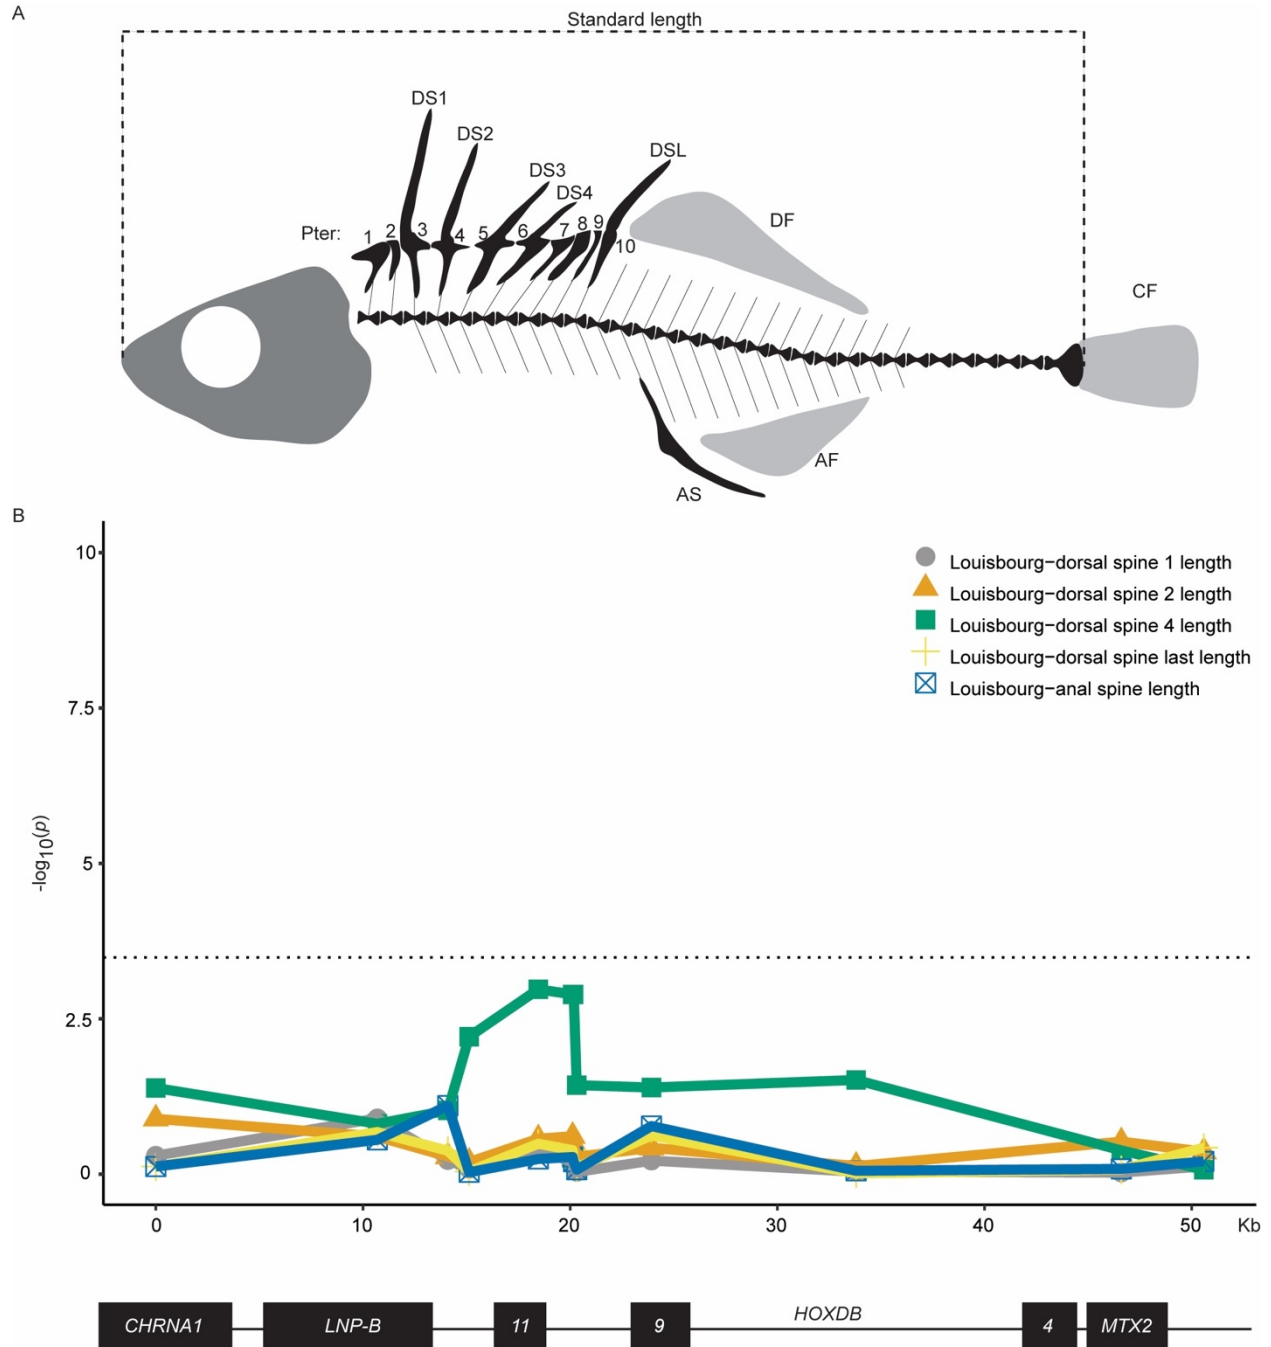

759  
760

761 **Supplemental Figure S5. Spine anatomy and trait association mapping in Louisbourg *Apeltes*.**

762 **A.** Schematic of anatomical structures in an *Apeltes* fish with five dorsal spines. Typical A-P  
763 midline pattern: two non-spine bearing pterygiophores (Pter 1 and 2), dorsal spine 1 (DS1) on  
764 pterygiophore 3 (Pter3), dorsal spine 2 (DS2) on pterygiophore 4 (Pter4), dorsal spine 3 (DS3) on  
765 pterygiophore 5 (Pter5), dorsal spine 4 (DS4) on pterygiophore 6 (Pter6), three non-spine bearing  
766 pterygiophores (Pter7-9), and dorsal spine last (DSL) on pterygiophore 10 (Pter10). The three  
767 unpaired fins are shown in light gray: dorsal fin (DF), caudal fin (CF), and anal fin (AF). The anal  
768 spine (AS) is indicated on the ventral side of the fish. The standard length shown with the dotted  
769 line is from the anterior tip of the jaw to the posterior of the hypural plates. **B.** The association

770 between *HOXDB* genotypes and length of DS1, DS2, DS4, DSL, and AS were not statistically  
 771 significant. For significant results with DS3 length, see Figure 5.

772

773

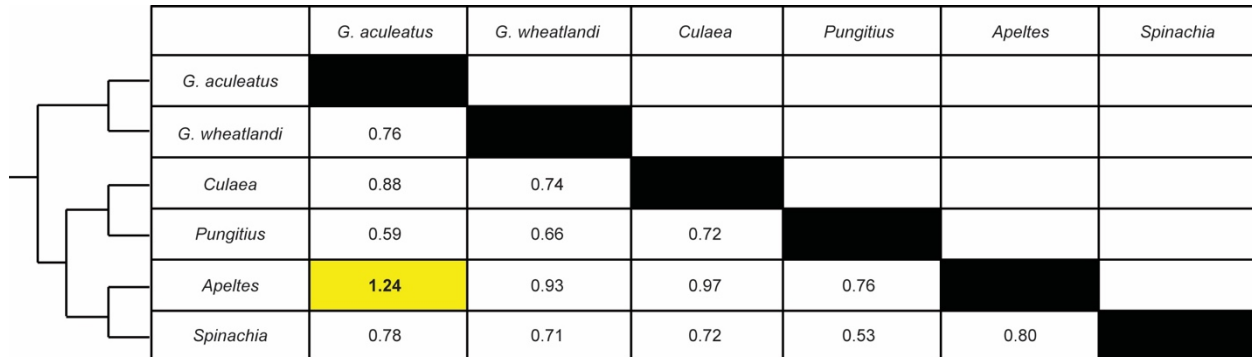

774

775

776 **Figure S6. dN/dS values for *HOXD11B* between pairs of stickleback species.** The tree on the  
 777 left shows phylogenetic relationships of extant stickleback species (branch length not drawn to  
 778 scale, (Kawahara et al., 2009; Liu et al., 2021)). The rate of non-synonymous to synonymous  
 779 substitutions in *HOXD11B* is higher than 1 for *Gasterosteus* and *Apeltes* comparisons (yellow  
 780 shading).

781

782

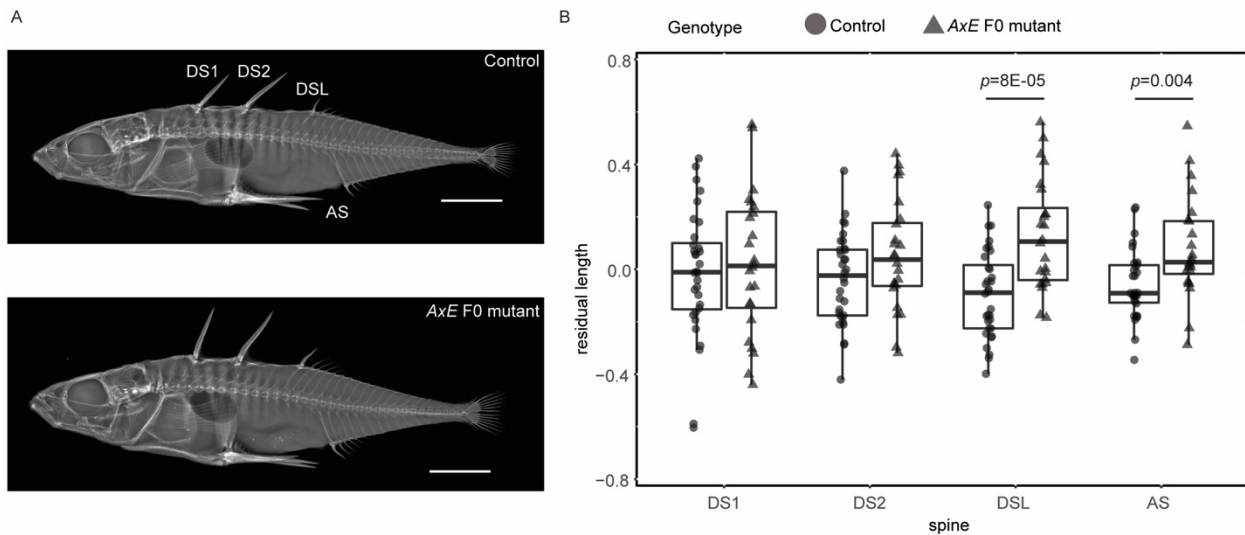

783

784 **Supplemental Figure S7. Mutation of *AxE* in a second anadromous *Gasterosteus* population**  
 785 **also causes length changes in DSL and AS.** **A.** Representative un.injected Little Campbell River  
 786 sibling control fish (top) and injected *AxE* F0 mutant (bottom). Scale bar is 5 mm. **B.** Quantification  
 787 of spine length difference. The residual after adjusting for standard length is on the y-axis and the  
 788 spines ordered from anterior to posterior are on the x-axis. DS1 and DS2 do not show a significant  
 789 difference in length between control and injected. DSL and AS were significantly longer in the  
 790 injected compared to the control.

790

791

792

793

## 792 **Materials and Methods**

793

### 794 **Stickleback care**

795

796 Wild sticklebacks were captured using minnow traps, dip nets, or small minnow seines. The  
797 populations used for this study and their GPS coordinates are listed in Table S1. All sticklebacks  
798 were treated in accordance with the recommendations in the Guide for the Care and Use of  
799 Laboratory Animals of the National Institutes of Health, using protocols approved by the  
800 Institutional Animal Care and Use Committee of Stanford University (IACUC protocol #13834),  
801 in animal facilities accredited by the Association for Assessment and Accreditation of Laboratory  
802 Animal Care International (AAALAC).

803

### 804 **DNA extractions**

805

806 DNA was isolated from single fins by placing them in lysis buffer (10mM Tris pH 8, 100mM NaCl,  
807 10 mM EDTA, 0.5% SDS) with Proteinase K (333µg/mL, NEB P8107S) at 55°C for between four  
808 hours and overnight. DNA was extracted with Phenol:Cholorform:Isoamyl Alcohol 25:24:1  
809 (Sigma, P3803) in phase lock tubes (Qiagen MaXtract High Density, 129056) and ethanol  
810 precipitated overnight. DNA was resuspended in TE Buffer (10mM Tris, 1 mM EDTA pH 8).

811

### 812 **QTL Mapping**

813

814 A wild-caught female from Boulton Lake, British Columbia, Canada (BOUL) was crossed by *in*  
815 *vitro* fertilization to a marine male stickleback from Bodega Bay, California, USA (BDGB). F1  
816 progeny were raised to adulthood in the laboratory in 30-gallon aquariums in RO-purified water  
817 with 3.5 ppt Instant Ocean salt and intercrossed to generate multiple F2 families. Sperm from F1  
818 males was cryopreserved (Aoki et al., 1997), so single males could be crossed multiple times. F2  
819 progeny fish were raised in lab for one year, then euthanized with 200 mg/L tricaine (Tricaine  
820 methanesulfonate, ANAD#200-226, Western Chemical Inc.) buffered to pH 7 with sodium  
821 bicarbonate and preserved in 70% ethanol.

822 DNA from each fish was extracted as described above, and the fish were genotyped using an  
823 Illumina GoldenGate genotyping array with 1536 features (Jones *et al.*, 2012). Intensity data were  
824 processed using GenomeStudio 2011. Genotype clusters were inspected and adjusted manually,  
825 and uninformative or low-intensity SNPs were excluded from downstream analysis. Phasing and  
826 linkage map construction were performed with TMAP (Cartwright et al., 2007). The linkage map  
827 and phased genotype data were then loaded into R/qtl (Broman et al., 2003) and filtered to remove  
828 fish with fewer than 600 genotype calls and markers with fewer than 300 calls. A final map was  
829 generated with 343 F2s and 452 markers.

830 *Gasterosteus* anatomical traits and landmarks are diagrammed in Figure S1. Abdominal, caudal,  
831 and total vertebral counts, as well as pterygiophore number were counted from X-rays taken on a  
832 Faxitron UltraFocus X-ray cabinet (settings: 38 kV, 4.8 seconds). The lengths of dorsal spine 1, 2,  
833 and last and anal spine were measured based on the x-rays using Fiji (Schindelin et al., 2012). The  
834 measurements were adjusted by taking the residuals from multiple regression against standard  
835 length and sex. The presence or absence of a fourth spine and number of pterygiophores (six or

836 more than six) were coded as binary traits (0 or 1). These phenotypes were used for QTL analysis  
837 in R/qtl using Haley–Knott regression via the “scanone” function, with a normal model for the  
838 length traits and a binary model for the spine and pterygiophore number (Broman et al. 2003). For  
839 the vertebral counts, a non-parametric (NP) scanone analysis was done. Permutation tests  
840 ( $n = 1,000$ ) were used to establish LOD significance thresholds ( $\alpha = 0.05$ ) for each trait. The  
841 analysis is based on 340 F2 fish and a set of 452 SNP markers.

#### 842 ***In situ* hybridization probes**

843 RNA was extracted by homogenizing ten to twenty stage 19/20 embryos in Trizol using a  
844 FastPrep-24 machine (MP Biomedicals) and lysing matrix M. RNA was washed once with  
845 chloroform, precipitated with isopropanol, and resuspended in DEPC water. RNA was treated with  
846 on-column DNase and was cleaned up using QIAGEN RNeasy Mini (Qiagen, 74104) cleanup  
847 protocol. cDNA was made with the SuperScript™ VILO™ cDNA Synthesis Kit (Thermo Fisher,  
848 11754050). For each riboprobe, RT-PCR amplification was done using the *in-situ* probe primers  
849 shown in Table S2. The *HOXD11B* probe was cloned into pCR2.1 TOPO (Invitrogen, K450001)  
850 in both orientations, and the *HOXD4B* and *HOXD9B* probes were cloned into pCRII-Blunt II-  
851 TOPO (Invitrogen, K280020) in both orientations. The vectors containing probe sequences were  
852 linearized with *Bam*HI (Thermo Scientific, FD0054), and the sense and antisense probes were *in*  
853 *vitro* transcribed with T7 RNA Polymerase (Promega, P2075).

#### 854 **Whole mount *in situ* hybridization**

855 To determine the expression patterns of the *HOXDB* genes, whole mount *in situ* hybridizations at  
856 Swarup stages 19-20 were done as described by (Thisse and Thisse, 2008) with the following  
857 modifications. Embryos were manually dechorionated with two Dumont #5 - Fine Forceps (FST,  
858 11251-10) after overnight fixation in 4% paraformaldehyde in PBS. To remove the pigmentation,  
859 they were bleached for ten minutes in 0.8% KOH, 3% hydrogen peroxide (30%), and 0.1%  
860 Tween20. Finally, embryos were permeabilized with Proteinase-K (NEB, P8107S) for ten seconds  
861 at 10 µg/ml in PBS with 0.1% Tween20.

#### 862 **GFP knock-in**

865 CRISPR-Cas9 was used to generate GFP reporter lines for *HOXD11B*, as described (Kimura et al.,  
866 2014). Cas9 protein (QB3 MacroLab University of California-Berkeley), a donor plasmid (pTia11-  
867 hspGFP, deposited at Addgene, containing hsp70, GFP, and a sgRNA target site), and two sgRNAs  
868 were injected. One sgRNA (*HOXD11B*-GFP-sgRNA, Table S3) targeted the region 346bp  
869 upstream of the endogenous *HOXD11B* start codon, and one targeted the donor plasmid. The  
870 *HOXD11B*-GFP-sgRNA was designed as previously described (Wucherpfennig et al., 2019). Tia11  
871 sgRNA was used to cut the plasmid (Lackner et al., 2015) and has a sequence not present in the  
872 *Gasterosteus aculeatus* genome. The injection mix contained a final concentration of 1 µg/µl Cas9  
873 protein, 31 ng/µl of Tia11 sgRNA, 31 ng/µl of the *HOXD11B*-GFP-sgRNA, 0.05% phenol red, and  
874 was adjusted to the final concentration with 10mM Tris pH 7.5.

875  
876 Fertilized eggs from *Gasterosteus* Little Campbell River (LITC) fish were injected at the single  
877 cell stage, and embryos were screened at st20 (~84 hpf) for GFP expression. Embryos with GFP



878 expression were raised to stages 29-31 (18dpf) and imaged again. The fry were anesthetized with  
879 3 mg/L tricaine (Tricaine methanesulfonate, ANAD#200-226, Western Chemical Inc.). Imaging  
880 was done with a MZFLIII fluorescent microscope (Leica Microsystems, Bannockburn, IL) using  
881 GFP2 filters and a ProgResCF camera (Jenoptik AG, Jena, Germany). GFP positive fish were  
882 grown to adulthood and crossed to wild-type LITC fish once they reach sexual maturity at  
883 approximately seven months of age. Progeny embryos were screened at st20 (~84 hpf) for GFP  
884 expression, and GFP-positive fish were raised to adulthood. To confirm integration and orientation  
885 of the GFP construct, primers were designed upstream and downstream of the *HOXD11B*-GFP-  
886 sgRNA site and in the plasmid on either side of the sgRNA cut site within the hsp70 promoter or  
887 the TOPO backbone (Table S2). All combinations of primers were tested by PCR; the presence  
888 and absence of bands was used to determine the orientation. Sanger sequencing of those products  
889 was used to determine the exact site of integration and any resulting deletions.

890

### 891 **Generation of *HOXD11B* coding and regulatory mutations using CRISPR-Cas9**

892

893 Mutations in the coding regions of *HOXD11B*, were generated by injecting Cas9 protein and an  
894 sgRNA targeting the first exon after the start codon (*HOXD11B*-coding-sgRNA, Table S3). The  
895 sgRNA was designed and synthesized as previously described (Wucherpfennig et al., 2019). The  
896 injection mix included 1 µg/µl of Cas9 protein, 300 ng/µl of the sgRNA, 0.05% phenol red, and  
897 was adjusted to final concentration with 10mM Tris pH 7.5. This mix was injected into fertilized  
898 eggs from two anadromous *Gasterosteus* populations (Little Campbell River, British Columbia,  
899 Canada and Rabbit Slough, Alaska, USA) at the single cell stage. Mutations were confirmed by  
900 PCR (using Phusion High-Fidelity DNA Polymerase (Thermo Scientific, F-530L), GC buffer, and  
901 3% DMSO) with *HOXD11B*-coding\_1F and 1R and *HOXD11B*-coding\_1F and 1R (Table S2).  
902 The PCR program was 98°C (3 min), then 35 cycles at 98°C (10 s) / 60°C (30 s) / 72°C (30 s), and  
903 a final extension at 72°C for 10 min.

904

905 Two different strategies were used to delete *AxE*, the conserved enhancer (466 bp) between  
906 *HOXD9B* and *HOXD11B*: 1) three sgRNAs (*AxE*-sgRNA\_1, 2, and 3, Table S3) and a 60bp repair  
907 phosphorothioate modified oligo (IDT) with 30bp of homology to either side of the enhancer  
908 (Renaud et al., 2016); or 2) a total of six sgRNAs (*AxE*-sgRNA\_1 through 6, Table S3) targeting  
909 the edges and middle of the enhancer. The sequence for the repair oligo was G\*A\*A CGT AAA  
910 AGG ATT CAG GAG CTC AAG CGA GTC GGT TCC AAA CGT GTC GTT GCC CAG C\*A\*G  
911 with the asterisks indicating the phosphorothioate bonds. If the first two bases of the sgRNA target  
912 sequences were not Gs, then they were replaced to aid in the transcription of the sgRNA. The  
913 injection mix included 1 µg/µl of Cas9 protein, 300 ng/µl of total of the sgRNAs (100 ng/µl of  
914 each for strategy 1, 50 ng/µl of each for strategy 2), 1.5 pmol/µl repair oligo (strategy 2 only),  
915 300mM KCl (Burger et al., 2016), 0.05% phenol red, and was adjusted to final concentration with  
916 water. The mutations were confirmed by PCR as described above, except that the extension time  
917 was increased to one minute and the annealing temperature was 64°C. Two sets of primers were  
918 used, with the first amplifying only the 571 bp region including the enhancer and the second  
919 including ~3.6 kb around the enhancer to identify potential larger mutations (Table S2).

920

### 921 ***Apeltes quadracus* association mapping**

922

923 Fourspine sticklebacks (*Apeltes quadracus*) were collected in May 2018 and May and July 2019  
924 using minnow traps and dip nets from Fortress Louisbourg (Site 325) and Tidnish River Site 3  
925 (Site 171) (Blouw, 1982) (GPS coordinates in Table S1). Sticklebacks were euthanized as  
926 described above and were fixed in 70% ethanol or Alfred Lamb's Navy Dark Rum 151 Proof.  
927 *Apeltes* anatomical traits and landmarks are diagrammed in Figure S5. Fish were phenotyped for  
928 spine number using a Faxitron UltraFocus X-ray cabinet. The dorsal and anal spine lengths and  
929 standard length of the Louisbourg fish were measured in triplicate using digital calipers, and the  
930 average of the measurements was used as the length. The residuals were calculated for each spine  
931 length taking into account the standard length of the fish. Pectoral and caudal fins were clipped to  
932 make genomic DNA as described above.

933  
934 To identify potential genotyping markers (microsatellites, indels, or SNPs) without a reference  
935 genome for *Apeltes*, *HOXDB* *Apeltes* sequence was amplified by PCR using primers (*PUNG-*  
936 *GAC\_1-11*, Table S2) conserved between the *Gasterosteus aculeatus* (Jones et al., 2012b) and  
937 *Pungitius* genomes (GenBank assembly accession numbers: GCA\_003399555.1,  
938 GCA\_003935095.1, GCA\_902500615.2) (Nelson and Cresko, 2018; Varadharajan et al., 2019)  
939 (Table S2). The PCR products were then TOPO cloned into pCRII-Blunt II-TOPO (Invitrogen,  
940 K280020), miniprep, and Sanger sequenced from two to four individuals with differing spine  
941 numbers to identify variable regions.

942  
943 The regions between the PCR products around *LUNAPARK-B*, *HOXD11B*, and *HOXD9B* were  
944 filled by designing primers spanning the existing products (Table S2). These PCR products were  
945 also cloned as described above and Sanger sequenced. Additional internal sequencing primers  
946 were designed to fully sequence the products (Table S2).

947  
948 Twelve markers were identified throughout the *Apeltes HOXDB* cluster and were scored in 211  
949 fish from Louisbourg Fortress (7 six-spine, 99 five-spine, 104 four-spine, 1 three-spine) and 121  
950 fish from Tidnish River 3 (1 six-spine, 59 five-spine, 59 four-spine, 1 three-spine, 1 two-spine).

951  
952 Microsatellite markers were amplified using the universal fluorescent primer system described by  
953 (Schuelke, 2000). A 20 µl PCR reaction mixture contained 2x Master Mix (Thermo Fisher, K0171),  
954 0.5 µM 6FAM M13 Forward universal primer, 0.125 µM forward primer, 0.5 µM reverse primer,  
955 and 10 ng of genomic DNA. The PCR program was 94°C (5 min), then 30 cycles at 94°C (30 s) /  
956 58°C (45 s) / 72°C (45 s), followed by 8 cycles 94°C (30 s) / 53°C (45 s) / 72°C (45 s), and a final  
957 extension at 72°C for 10 min. For *AQ-HOXDB\_2*, the cycle number was reduced from 30 to 27.  
958 The PCR was cleaned up using ExoSAP-IT PCR Product Cleanup Reagent (Applied Biosystems,  
959 78205.1.ML), and the fragment sizes were analyzed on Applied Biosystems 3730xl Genetic  
960 Analyzer. Peaks were called using the Microsatellite plugin for Geneious.

961  
962 The PCR reaction mix for indel and SNP markers was 2x PCR Master Mix, 0.5 µM Forward  
963 Primer, 0.5 µM Reverse Primer and 10 ng of genomic DNA. The PCR program was 95°C (5 min),  
964 then 35 cycles at 95°C (30 s) / 54°C (45 s) / 72°C (30 s), and a final extension at 72°C for 10 min.  
965 The one exception was *AQ-HOXDB\_6*, where the PCR was done with Phusion High-Fidelity DNA  
966 Polymerase (Thermo Scientific, F-530L), GC buffer, and 3% DMSO, and the PCR program was  
967 98°C (3 min), then 35 cycles at 98°C (10 s) / 60°C (30 s) / 72°C (10 s), and a final extension at  
968 72°C for 10 min. The *AQ-HOXDB\_5* PCR product was digested with *BssSI-v2* (NEB, R0680L),

969 and the *AQ-HOXDB\_6* PCR product was digested with *NdeI* (Thermo Scientific FD0583). PCR  
970 products were run on a 2% agarose gel to detect size differences.

971  
972 The allele frequencies in low-spine (two- to four-spine) and high-spine (five- to six-spine) fish  
973 were compared using CLUMP (Sham and Curtis, 1995), which performs a modified chi-square  
974 analysis to determine significance of allele frequency differences. For microsatellite markers, the  
975 negative log p-values of the chi-squared value (T4) from the 2X2 contingency table generated by  
976 CLUMP are shown in Figure 5. For indel or SNP markers, a chi-square test was performed in R  
977 (v. 3.6.1). The association between spine length (the average of triplicate measurements) and  
978 genotype was quantified using an ANOVA performed in R, using the residual spine length after  
979 accounting for the standard length of the fish.

### 980 981 ***Apeltes* genome assembly**

982  
983 Whole genome sequencing using 10X Genomics chromium linked read technology was performed  
984 on two *Apeltes quadracus* from the Louisbourg Fortress population (one four-spine and one five-  
985 spine). Genomic DNA was extracted from the brains of the fish and prepared using Qiagen  
986 MagAttract HMW DNA kit. The linked-read data of each fish were assembled using Supernova  
987 v.2.1.1 with default settings (Weisenfeld et al., 2014). The 4-spine *Apeltes* assembly had 16,216  
988 scaffolds with 416,290,932 bases (scaffold N50: 393,888 bp; L50: 247; N90: 7,174 bp; L90: 3,684).  
989 The 5-spine *Apeltes* assembly had 24,175 scaffolds with 397,678,333 bases (scaffold N50: 69,128  
990 bp; L50:1,629 ; N90: 4,805 bp; L90: 10,192).

991  
992 To be able to use GATK in the allele-specific RNA-sequencing pipeline, the genome needed to be  
993 on fewer scaffolds than were generated by the linked read data. To achieve this, we started with  
994 the 4-spine *Apeltes* assembly and assumed that the chromosome structure of *Apeltes* and  
995 *Gasterosteus* are similar. We used a reference guided scaffold approach by generating global  
996 genome to genome alignments with minimap2 (Li, 2018) and MUMmer (Marçais et al., 2018).  
997 The alignment information was processed by RaGOO (Alonge et al., 2019) to order and orient  
998 contigs into scaffolds, which resulted in the *Apeltes* genome reference used in the GATK allele-  
999 specific RNA-sequencing pipeline.

### 1000 1001 **High-spine *Gasterosteus* genome assembly**

1002  
1003 Whole genome sequencing using 10X Genomics chromium linked read technology was performed  
1004 on two four-spine *Gasterosteus aculeatus* from the F5 generation of the BOUL-BDGB QTL cross.  
1005 Genomic DNA was extracted from the brains of the fish and prepared using Qiagen MagAttract  
1006 HMW DNA kit. The linked-read data of each fish were assembled using Supernova v.2.1.1 with  
1007 default settings (Weisenfeld et al., 2014).

1008  
1009 Whole genome sequencing using PacBio HiFi technology was also performed on one four-  
1010 spine *Gasterosteus aculeatus* from the F5 generation of the BOUL-BDGB QTL cross. Genomic  
1011 DNA was extracted from the testes of the fish and prepared using Qiagen MagAttract HMW DNA  
1012 kit. The genome was assembled using CANU. The purge haplotigs pipeline  
1013 ([https://bitbucket.org/mroachawri/purge\\_haplotigs/src/master/](https://bitbucket.org/mroachawri/purge_haplotigs/src/master/)) was used to phase the alleles and

1014 identify the contigs that appeared twice in the assembly. The final assembly had 483 scaffolds with  
1015 a total of 489,328,730 bases (scaffold N50: 3,689,351 bp; L50: 37; N90: 633,554 bp; L90:166).

1016

### 1017 **Transgenic enhancer assays**

1018

1019 To identify and confirm sequence variants in the intergenic region between *HOXD9B* and  
1020 *HOXD11B*, the ~6 kb intergenic region from *Apeltes* was amplified from a three-spine and a six-  
1021 spine *Apeltes* from the Louisbourg Fortress population and a three-spine and a six-spine from the  
1022 Tidnish River 3 population with Phusion High-Fidelity DNA Polymerase (Thermo Scientific, F-  
1023 530L) in GC Buffer and 3% DMSO using primers in Table S2. The resulting products were TOPO  
1024 cloned into pCRII-Blunt II-TOPO. Colonies were minipreped and Sanger sequenced. To generate  
1025 the plasmids for the enhancer assay, the low- and high-spine versions of the ~600 bp region that  
1026 contains *AxE* were then amplified with primers that included overhangs homologous to the PT2HE  
1027 GFP reporter vector (Howes et al., 2017; Kotani et al., 2006). The reporter vector was cut with  
1028 *EcoRV* (Thermo Scientific, ER0201) and the insert and vector were joined using Gibson Cloning  
1029 (NEB # E2611S). The resulting plasmids were screened by *SacI* (Thermo Scientific, ER1131)  
1030 restriction digest and further Sanger sequenced to check for mutations. The 587 bp high-spine and  
1031 611 bp low-spine *Apeltes AxE* sequences are available in GenBank at OKxxxxxx and OKxxxxxx,  
1032 respectively.

1033

1034 Transgenic *G. aculeatus* sticklebacks were generated by microinjection of fertilized eggs at the  
1035 single cell stage from LITC *G. aculeatus* as described in (Chan et al., 2010). Plasmids (25 ng/μl)  
1036 were injected with Tol2 transposase mRNA (36 ng/μl) and 0.1% Phenol red as described in  
1037 (Hosemann et al., 2004). Tol2 mRNA was synthesized by *in vitro* transcription using the  
1038 mMessage mMachine SP6 kit (Invitrogen, AM1340) from pCS-TP plasmid (Kawakami et al.,  
1039 2004) cut with *BspI20I* (Thermo Scientific, ER0131). Transgenics were imaged at st20 (~84 hpf)  
1040 and st29/31 (~18-30 dpf) as described in the GFP knock-in section above. The hsp70 promoter  
1041 drives expression in the lens of the eye by nine days post fertilization (Nagayoshi et al., 2008). At  
1042 st29/31, bilateral lens GFP expression was used to identify less mosaic fish.

1043

### 1044 **dN-dS calculation**

1045

1046 dN-dS calculations were performed in R using ape v5.3 (Paradis and Schliep, 2019). The sequence  
1047 alignments for each gene (*HOXD11B*, *HOXD9B*, and *HOXD4B*) were generated in Geneious using  
1048 translation alignment. The mature transcript for each gene was determined based on the splicing  
1049 that has been validated using cDNA in *G. aculeatus*. The sequences for *P. pungitius* were  
1050 determined by BLASTN (Altschul et al., 1990) of the *G. aculeatus* exons against the genome  
1051 (*Pungitius*: GCA\_003935095.1 (Nelson and Cresko, 2018)). The sequences for *Apeltes* were  
1052 identified from our genome assembly. The sequences for *Gasterosteus wheatlandi*, *Culaea*  
1053 *inconstans*, and *Spinachia spinachia* were identified by BLAST of the *G. aculeatus* exons against  
1054 unassembled short reads from whole genome sequencing of the respective species ((Liu et al.,  
1055 2021) and Catherine Peichel, personal communication).

### 1056 **RNA-sequencing**



1057 For *Gasterosteus* RNA-sequencing, a lab-raised Little Campbell River anadromous female with  
1058 three dorsal spines was crossed to a high-spine *Gasterosteus* male with five dorsal spines. The  
1059 high-spine *Gasterosteus* line is the F5 generation of the original QTL cross between BOUL and  
1060 BDGB used to identify the *HOXDB* locus. The fish have been selected for high spine number, and  
1061 by F5, more than 80% of fish have four or more dorsal spines. To confirm that the fish carried the  
1062 BOUL allele at the *HOXDB* locus, the allele was amplified using BOUL-*HOXDB*\_1F and 1R  
1063 (Table S2) with Phusion High-Fidelity DNA Polymerase (Thermo Scientific, F-530L) in GC  
1064 Buffer and 3% DMSO using a 2-step PCR program (94°C (1 min), then 30 cycles at 98°C (10 s) /  
1065 68°C (15 minutes), and a final extension at 72°C for 10 min) and run on an agarose gel. The  
1066 Boulton allele is ~15kb, and the Bodega Bay allele is ~1.9 kb. The sequences of the two alleles are  
1067 available at OKxxxxxx (Bodega Bay) and OKxxxxxx (Boulton) in GenBank.

1068 The resulting clutch was raised to 11-13mm. The fry were euthanized in 200 mg/L tricaine buffered  
1069 to pH 7 with sodium bicarbonate. The fish were dissected on a 2% agarose plate with size 00 insect  
1070 pins and Vannas Spring Scissors - 2.5mm Cutting Edge (FST, 15000-08). The tissues (shown in  
1071 Figure 4A were: dorsal spine 1, dorsal spine 2, dorsal spine 3, dorsal spine last, blank pterygiophore,  
1072 dorsal fin, and anal fin) were flash frozen in liquid nitrogen in FastPrep Tubes (MP Biomedicals,  
1073 MP115076200). DNA was extracted from tails and genotyped to ensure fish had informative SNPs  
1074 in the coding region of *HOXD11B* and *HOXD9B*. For *HOXD11B*, the primers were *HOXD11B*-  
1075 coding\_1F and 1R (Table S2). For *HOXD9B*, the primers were *HOXD9B*-coding\_1F and 1R  
1076 (Table S2). The PCR conditions were the same as described above for the confirmation of  
1077 *HOXD11B* CRISPR mutants.

1078 Based on the genotyping, twelve three-spine progeny and six four-spine progeny were chosen for  
1079 RNA extraction, library prep, and sequencing. Samples for RNA extraction were homogenized  
1080 using MP FastPrep 2 x 20 seconds with Matrix M with a five-minute rest in between. RNA  
1081 extractions were performed using NucleoSpin® RNA XS (Takara) and resuspended in 20ul of  
1082 RNase free water. RNA was quantified by Qubit (Invitrogen) using HS Assay Kit (Invitrogen,  
1083 Q32851). A subset of samples was quality controlled to check the RIN values by Bioanalyzer using  
1084 the RNA 6000 Pico Kit (Agilent, 5067-1513). The RINs were between 8.2 and 10, with most  
1085 higher than 9.6. Sequencing libraries were generated with Illumina Stranded mRNA Prep kit  
1086 (Illumina, 20040532) and 20-100 ng of RNA (depending on the amount of RNA; if less than 100  
1087 ng was extracted, the entire sample was used). The PCR cycle number was determined by qPCR  
1088 and was generally: 12 cycles for embryo samples with 200 ng of RNA, 14 cycles for dorsal spine  
1089 and pterygiophore samples with 100 ng of RNA, 13 cycles for dorsal and anal fin samples with  
1090 100 ng of RNA, and 15 cycles for samples with less than 100 ng of RNA input. Quality control of  
1091 libraries was done by Qubit with a dsDNA HS Assay Kit (Invitrogen, Q32851) to check the  
1092 concentration and by BioAnalyzer with a high sensitivity kit (Agilent, 5067-4626) to check the  
1093 size. Libraries were sequenced to a coverage of ~30 million reads on a NovaSeq 6000 (2 x 150 bp)  
1094 by NovoGene. Reads were trimmed with Cutadapt (Martin, 2011) using the TrimGalore wrapper  
1095 (<https://github.com/FelixKrueger/TrimGalore>), and reads were mapped to the *gasAcuI-4* reference  
1096 genome (<https://datadryad.org/stash/dataset/doi:10.5061/dryad.547d7wm6t>) with STAR two-pass  
1097 mapping (Dobin et al., 2013). For allele-specific expression analysis, the base quality was adjusted  
1098 and variants were called using GATK as recommended by Broad Institute best practices (Van der  
1099 Auwera et al., 2013; Depristo et al., 2011). The reads at each site were counted using GATK  
1100 ASEReadCounter. We required that SNPs be called as heterozygous in at least one tissue of each

1101 fish, that the number of reads at a given site be greater than 12 (three-spine) or 14 (four-spine) for  
1102 each fish, and that the overall minor allele frequency be greater than 5%. To quantify the allele-  
1103 specific expression differences seen between the dorsal tissues and the anal fin (control), we took  
1104 the log<sub>2</sub> ratio of the reference reads to the alternate reads within each sample and compared each  
1105 dorsal tissue to the anal fin using a Mann-Whiney U test.

1106 To improve the gene predictions and recover any novel transcripts for differential gene expression  
1107 analysis, StringTie was used along with the existing Ensembl annotations to predict the transcripts  
1108 (Pertea et al., 2015). Given the large number of reads, bam files were filtered by quality,  
1109 downsampled to 20%, and merged into one file that was used as the input for StringTie. The merge  
1110 function was used to add back in genes from the Ensembl annotations not present in the sequenced  
1111 samples. All *Hox* genes were manually checked. In some cases, the two genes were merged into  
1112 one due to their close proximity; these were manually separated in the GTF file. FeatureCounts  
1113 was then used with the new GTF file to assign reads to genes (Liao et al., 2014). Differential gene  
1114 expression between different tissues was performed in DESeq2 (Love et al., 2014).

1115 For *Apeltes* RNA-sequencing, the same protocol was followed as detailed for *Gasterosteus* above,  
1116 with the following differences. The spines, blank pterygiophore, dorsal fin, and anal fin were  
1117 dissected from Louisbourg *Apeltes* clutches raised in the lab to 11-13mm. The fry were genotyped  
1118 for the two peak association mapping marker (*AQ-HOXDB\_6* and 7) using the same primers and  
1119 conditions described above under *Apeltes* association mapping. For allele-specific expression  
1120 analysis, four fish with L/LHR (heterozygous for the 18bp indel allele (*AQ-HOXDB\_7*) and  
1121 homozygous for the 2 adjacent SNPs, GG (*AQ-HOXDB\_6*)) genotype, four fish with H/L  
1122 (heterozygous for the 18bp indel and the 2 adjacent SNPs) genotype, and three fish with H/LHR  
1123 (homozygous for the 18bp deletion and heterozygous for the 2 adjacent SNPs) genotype were  
1124 sequenced. Three four-spine L/L (homozygous for the 18bp intact allele and homozygous for the  
1125 2 adjacent SNPs, GG) genotype were also sequenced to examine the expression differences  
1126 between tissues. To generate gene predictions for the *Apeltes* genome, StringTie was used; the *Hox*  
1127 genes were identified by BLAST and manually named in the GTF file (Altschul et al., 1990). For  
1128 the high-spine fish, allele-specific analysis was performed as described above for *Gasterosteus*.  
1129 The *Apeltes* 10X linked read data was used as input for 10X Long Ranger (v. 2.2.2) to generate a  
1130 vcf file of known variants for GATK Baserecalibrator. Because the clutch size of *Apeltes* is smaller  
1131 and thus the number of replicates was lower than in the *Gasterosteus* analysis, we use a Fisher's  
1132 Exact Test to compare expression in dorsal tissues to the anal fin. We summed the references and  
1133 alternate reads within each tissue to generate a 2x2 contingency table. For the analysis show in  
1134 Figure S4, differential gene expression between tissues was performed in DESeq2 (Love et al.,  
1135 2014).

### 1136 **Data and code availability**

1137 The raw and processed allele-specific RNA-sequencing data in this paper will be available in the  
1138 NCBI GEO database: GSExxxxxx (subseries GSExxxxxx, GSExxxxxx, GSExxxxxx,  
1139 GSExxxxxx). The PacBio HiFi and 10X linked read data from *Gasterosteus* high-spine sequencing  
1140 will be available in the NCBI databases under BioProject number: PRJNAxxxxxx. The 10X linked  
1141 read data from *Apeltes quadracus* four- and five-spine fish will be available under BioProject  
1142 number: PRJNAxxxxxx. The sequence surrounding *AxE* in *Gasterosteus* from the two parental

1143 QTL populations and the *Apeltes AxE* sequences tested in transgenic assays will be available in  
1144 GenBank (OKxxxxxx, OKxxxxxx, OKxxxxxx, OKxxxxxx). QTL mapping files, phenotype data  
1145 files, association mapping genotype files, and code will be available at Mendeley Data. The  
1146 pTia11-hspGFP plasmid will be available from Addgene. Other materials will be made available  
1147 upon request.

## 1148 **References**

- 1149 Ahn, D.G., and Gibson, G. (1999a). Expression patterns of threespine stickleback *Hox* genes and  
1150 insights into the evolution of the vertebrate body axis. *Dev. Genes Evol.* *209*, 482–494.  
1151 doi:10.1007/s004270050281.
- 1152 Ahn, D.G., and Gibson, G. (1999b). Axial variation in the threespine stickleback: relationship to  
1153 *Hox* gene expression. *Dev. Genes Evol.* *209*, 473–481. doi:10.1007/s004270050280.
- 1154 Aldenhoven, J.T., Miller, M.A., Corneli, P.S., and Shapiro, M.D. (2010). Phylogeography of  
1155 ninespine sticklebacks (*Pungitius pungitius*) in North America: glacial refugia and the origins of  
1156 adaptive traits. *Mol. Ecol.* 4061–4076. doi:10.1111/j.1365-294X.2010.04801.x.
- 1157 Allais-Bonnet, A., Hintermann, A., Deloche, M.-C., Cornette, R., Bardou, P., Naval-Sanchez,  
1158 M., Pinton, A., Haruda, A., Grohs, C., Zakany, J., et al. (2021). Analysis of polycerate mutants  
1159 reveals the evolutionary co-option of *HOXD1* for horn patterning in Bovidae. *Mol. Biol. Evol.*  
1160 doi:10.1093/molbev/msab021.
- 1161 Alonge, M., Soyk, S., Ramakrishnan, S., Wang, X., Goodwin, S., Sedlazeck, F.J., Lippman,  
1162 Z.B., and Schatz, M.C. (2019). RaGOO: Fast and accurate reference-guided scaffolding of draft  
1163 genomes. *Genome Biol.* *20*, 1–17. doi:10.1186/s13059-019-1829-6.
- 1164 Altschul, S.F., Gish, W., Miller, W., Myers, E.W., and Lipman, D.J. (1990). Basic local  
1165 alignment search tool. *J. Mol. Biol.* *215*, 403–410. doi:10.1016/S0022-2836(05)80360-2.
- 1166 Aoki, K., Okamoto, M., Tatsumi, K., and Ishikawa, Y. (1997). Cryopreservation of medaka  
1167 spermatozoa. *Zoolog. Sci.* *14*, 641–644. doi:10.2108/zsj.14.641.
- 1168 Van der Auwera, G.A., Carneiro, M.O., Hartl, C., Poplin, R., del Angel, G., Levy-Moonshine,  
1169 A., Jordan, T., Shakir, K., Roazen, D., Thibault, J., et al. (2013). From FastQ data to high-  
1170 confidence variant calls: The genome analysis toolkit best practices pipeline.  
1171 doi:10.1002/0471250953.bi1110s43.
- 1172 Averof, M., and Patel, N.H. (1997). Crustacean appendage evolution associated with changes in  
1173 *Hox* gene expression. *Nature* *388*, 682–686. doi:10.1038/41786.
- 1174 Barrett, R.D.H., and Schluter, D. (2008). Adaptation from standing genetic variation. *Trends*  
1175 *Ecol. Evol.* *23*, 38–44. doi:10.1016/j.tree.2007.09.008.
- 1176 Bell, M., and Foster, S.A. (1994). *The evolutionary biology of the threespine stickleback*  
1177 (Oxford: Oxford University Press).
- 1178 Bell, M.A., and Baumgartner, J. V (1984). An unusual population of *Gasterosteus aculeatus*  
1179 from Boston, Massachusetts. *Copeia* *1984*, 258–262. doi:10.2307/1445073.
- 1180 Bell, M.A., Francis, R.C., Havens, A.C., Bell, M.A., Francis, R.C., and Havens, A.C. (1985).  
1181 Pelvic reduction and its directional asymmetry in threespine sticklebacks from the Cook Inlet  
1182 region. *Copeia* *1985*, 437–444. doi:10.2307/1444855.

- 1183 Bender, W., Akam, M., Karch, F., Beachy, P.A., Peifer, M., Spierer, P., Lewis, E.B., and  
1184 Hogness, D.S. (1983). Molecular genetics of the bithorax complex in *Drosophila melanogaster*.  
1185 *Science* 221, 23–29. doi:10.1126/science.221.4605.23.
- 1186 Berner, D., Moser, D., Roesti, M., Buescher, H., and Salzburger, W. (2014). Genetic architecture  
1187 of skeletal evolution in european lake and stream stickleback. *Evolution* 68, 1792–1805.  
1188 doi:10.1111/evo.12390.
- 1189 Bienz, M., and Tremml, G. (1988). Domain of *Ultrabithorax* expression in *Drosophila* visceral  
1190 mesoderm from autoregulation and exclusion. *Nature* 333, 576–578. doi:10.1038/333576a0.
- 1191 Blouw, D.M. (1982). The adaptive significance of a polymorphism for dorsal spine number in  
1192 *Apeltes quadracus*, and comparison with several coexisting sticklebacks. University of New  
1193 Brunswick.
- 1194 Blouw, D.M., and Hagen, D.W. (1984a). The adaptive significance of dorsal spine variation in  
1195 the fourspine stickleback, *Apeltes quadracus*. I. Geographic variation in spine number. *Can. J.*  
1196 *Zool.* 62, 1329–1339. doi:10.1038/hdy.1984.94.
- 1197 Blouw, D.M., and Hagen, D.W. (1984b). The adaptive significance of dorsal spine variation in  
1198 the fourspine stickleback, *Apeltes quadracus*. II. Phenotype-environment correlations. *Can. J.*  
1199 *Zool.* 62, 1340–1350. doi:10.1038/hdy.1984.94.
- 1200 Blouw, D.M., and Hagen, D.W. (1984c). The adaptive significance of dorsal spine variation in  
1201 the fourspine stickleback, *Apeltes quadracus*. III. Correlated traits and experimental evidence on  
1202 predation. *Heredity* 53, 371–382. doi:10.1038/hdy.1984.94.
- 1203 Blouw, D.M., and Hagen, D.W. (1984d). The adaptive significance of dorsal spine variation in  
1204 the fourspine stickleback, *Apeltes quadracus*. IV. Phenotypic covariation with closely related  
1205 species. *Heredity* 53, 383–396. doi:10.1038/hdy.1984.95.
- 1206 Broman, K.W., Wu, H., Sen, S., and Churchill, G.A. (2003). R/qtl: QTL mapping in  
1207 experimental crosses. *Bioinformatics* 19, 889–890. doi:10.1093/bioinformatics/btg112.
- 1208 Burger, A., Lindsay, H., Felker, A., Hess, C., Anders, C., Chiavacci, E., Zaugg, J., Weber, L.M.,  
1209 Catena, R., Jinek, M., et al. (2016). Maximizing mutagenesis with solubilized CRISPR-Cas9  
1210 ribonucleoprotein complexes. 2025–2037. doi:10.1242/dev.134809.
- 1211 Burke, A.C., Nelson, C.E., Morgan, B.A., and Tabin, C. (1995). *Hox* genes and the evolution of  
1212 vertebrate axial morphology. *Development* 121, 333–346.
- 1213 Carroll, S.B. (1995). Homeotic genes and the evolution of arthropods and chordates. *Nature* 376,  
1214 479–485. doi:10.1038/376479a0.
- 1215 Carroll, S.B., Weatherbee, S.D., and Langeland, J.A. (1995). Homeotic genes and the regulation  
1216 and evolution of insect wing number. *Nature* 375, 58–61. doi:10.1038/375058a0.
- 1217 Carroll, S.B., Grenier, J.K., and Weatherbee, S.D. (2005). From DNA to diversity : molecular  
1218 genetics and the evolution of animal design (Malden, MA: Blackwell Pub.).
- 1219 Cartwright, D.A., Troggio, M., Velasco, R., and Gutin, A. (2007). Genetic mapping in the  
1220 presence of genotyping errors. *Genetics* 176, 2521–2527. doi:10.1534/genetics.106.063982.
- 1221 Chan, Y.F., Marks, M.E., Jones, F.C., Villarreal, G., Shapiro, M.D., Brady, S.D., Southwick,  
1222 A.M., Absher, D.M., Grimwood, J., Schmutz, J., et al. (2010). Adaptive evolution of pelvic  
1223 reduction in sticklebacks by recurrent deletion of a *Pitx1* enhancer. *Science* 327, 302–305.



- 1224 doi:10.1126/science.1182213.
- 1225 Cleves, P.A., Ellis, N.A., Jimenez, M.T., Nunez, S.M., Schluter, D., Kingsley, D.M., and Miller,  
1226 C.T. (2014). Evolved tooth gain in sticklebacks is associated with a *cis*-regulatory allele of  
1227 *Bmp6*. Proc. Natl. Acad. Sci. *111*, 13912–13917. doi:10.1073/pnas.1407567111.
- 1228 Colosimo, P.F., Hosemann, K.E., Balabhadra, S., Villarreal, G.J., Dickson, M., Grimwood, J.,  
1229 Schmutz, J., Myers, R.M., Schluter, D., and Kingsley, D.M. (2005). Widespread parallel  
1230 evolution in sticklebacks by repeated fixation of Ectodysplasin alleles. Science *307*, 1928–1933.  
1231 doi:10.1126/science.1107239.
- 1232 Darwin, C. (1859). On the origin of species by means of natural selection.
- 1233 Delker, R.K., Ranade, V., Loker, R., Voutev, R., and Mann, R.S. (2019). Low affinity binding  
1234 sites in an activating CRM mediate negative autoregulation of the *Drosophila* Hox gene  
1235 *Ultrabithorax*. PLOS Genet. *15*, e1008444. doi:10.1371/journal.pgen.1008444.
- 1236 Depristo, M.A., Banks, E., Poplin, R., Garimella, K. V., Maguire, J.R., Hartl, C., Philippakis,  
1237 A.A., Del Angel, G., Rivas, M.A., Hanna, M., et al. (2011). A framework for variation discovery  
1238 and genotyping using next-generation DNA sequencing data. Nat. Genet. *43*, 491–501.  
1239 doi:10.1038/ng.806.
- 1240 Dobin, A., Davis, C. a, Schlesinger, F., Drenkow, J., Zaleski, C., Jha, S., Batut, P., Chaisson, M.,  
1241 and Gingeras, T.R. (2013). STAR: ultrafast universal RNA-seq aligner. Bioinformatics *29*, 15–  
1242 21. doi:10.1093/bioinformatics/bts635.
- 1243 Durston, A.J. (2012). Global posterior prevalence is unique to vertebrates: A dance to the music  
1244 of time? Dev. Dyn. *241*, 1799–1807. doi:10.1002/dvdy.23852.
- 1245 Goldschmidt, R. (1940). The material basis of evolution (Yale University Press).
- 1246 Greyvenstein, O.F.C., Reich, C.M., Van Marle-Koster, E., Riley, D.G., and Hayes, B.J. (2016).  
1247 Polyceraty (multi-horns) in Damara sheep maps to ovine chromosome 2. Anim. Genet. *47*, 263–  
1248 266. doi:10.1111/age.12411.
- 1249 Hagen, D.W. (1967). Isolating mechanisms in threespine sticklebacks (*Gasterosteus*). J. Fish.  
1250 Res. Board Canada *24*, 1637–1692. doi:10.1139/f67-138.
- 1251 Hagen, D.W., and Blouw, D.M. (1983). Heritability of dorsal spines in the fourspine stickleback  
1252 (*Apeltes quadracus*). Heredity *50*, 275–281. doi:10.1038/hdy.1983.29.
- 1253 Harding, K., Wedeen, C., McGinnis, W., and Levine, M. (1985). Spatially regulated expression  
1254 of homeotic genes in *Drosophila*. Science *229*, 1236–1242. doi:10.1126/science.3898362.
- 1255 Höch, R., Schneider, R.F., Kickuth, A., Meyer, A., and Woltering, J.M. (2021). Spiny and soft-  
1256 rayed fin domains in acanthomorph fish are established through a BMP-*gremlin-shh* signaling  
1257 network. Proc. Natl. Acad. Sci. USA *118*, 1–8. doi:10.1073/pnas.2101783118.
- 1258 Hoegg, S., Boore, J.L., Kuehl, J. V, and Meyer, A. (2007). Comparative phylogenomic analyses  
1259 of teleost fish Hox gene clusters: lessons from the cichlid fish *Astatotilapia burtoni*. *16*, 1–16.  
1260 doi:10.1186/1471-2164-8-317.
- 1261 Hoogland, R., Morris, D., and Tinbergen, N. (1956). The spines of sticklebacks (*Gasterosteus*  
1262 and *Pygosteus*) as means of defence against predators (*Perca* and *Esox*). Behaviour *10*, 205–236.  
1263 doi:10.1163/156853956X00156.
- 1264 Hosemann, K.E., Colosimo, P.F., Summers, B.R., and Kingsley, D.M. (2004). A simple and



- 1265 efficient microinjection protocol for making transgenic sticklebacks. *Behaviour* *141*, 1345–1355.  
1266 doi:10.1163/1568539042948097.
- 1267 Howes, T.R., Summers, B.R., and Kingsley, D.M. (2017). Dorsal spine evolution in threespine  
1268 sticklebacks via a splicing change in *MSX2A*. *BMC Biol.* *15*, 115. doi:10.1186/s12915-017-  
1269 0456-5.
- 1270 Irvine, K.D., Botas, J., Jha, S., Mann, R.S., and Hogness, D.S. (1993). Negative autoregulation  
1271 by *Ultrabithorax* controls the level and pattern of its expression. *Development* *117*, 387–399.  
1272 doi:10.1242/dev.117.1.387.
- 1273 Izpisua-Belmonte, J.C., Falkenstein, H., Dolle, P., Renucci, A., and Duboule, D. (1991). Murine  
1274 genes related to the *Drosophila AbdB* homeotic gene are sequentially expressed during  
1275 development of the posterior part of the body. *EMBO J.* *10*, 2279–2289. doi:10.1002/j.1460-  
1276 2075.1991.tb07764.x.
- 1277 Jones, F.C., Chan, Y.F., Schmutz, J., Grimwood, J., Brady, S.D., Southwick, A.M., Absher,  
1278 D.M., Myers, R.M., Reimchen, T.E., Deagle, B.E., et al. (2012a). A genome-wide SNP  
1279 genotyping array reveals patterns of global and repeated species-pair divergence in sticklebacks.  
1280 *Curr. Biol.* *22*, 83–90. doi:10.1016/j.cub.2011.11.045.
- 1281 Jones, F.C., Grabherr, M.G., Chan, Y.F., Russell, P., Mauceli, E., Johnson, J., Swofford, R.,  
1282 Pirun, M., Zody, M.C., White, S., et al. (2012b). The genomic basis of adaptive evolution in  
1283 threespine sticklebacks. *Nature* *484*, 55–61. doi:10.1038/nature10944.
- 1284 Kawahara, R., Miya, M., Mabuchi, K., Near, T.J., and Nishida, M. (2009). Stickleback  
1285 phylogenies resolved: Evidence from mitochondrial genomes and 11 nuclear genes. *Mol.*  
1286 *Phylogenet. Evol.* *50*, 401–404. doi:10.1016/j.ympev.2008.10.014.
- 1287 Kawakami, K., Takeda, H., Kawakami, N., Kobayashi, M., Matsuda, N., and Mishina, M.  
1288 (2004). A transposon-mediated gene trap approach identifies developmentally regulated genes in  
1289 zebrafish. *Dev. Cell* *7*, 133–144. doi:10.1016/j.devcel.2004.06.005.
- 1290 Kimura, Y., Hisano, Y., Kawahara, A., and Higashijima, S.I. (2014). Efficient generation of  
1291 knock-in transgenic zebrafish carrying reporter/driver genes by CRISPR/Cas9-mediated genome  
1292 engineering. *Sci. Rep.* *4*, 1–7. doi:10.1038/srep06545.
- 1293 Kotani, T., Nagayoshi, S., Urasaki, A., and Kawakami, K. (2006). Transposon-mediated gene  
1294 trapping in zebrafish. *Methods* *39*, 199–206. doi:10.1016/j.ymeth.2005.12.006.
- 1295 Lackner, D.H., Carré, A., Guzzardo, P.M., Banning, C., Mangena, R., Henley, T., Oberndorfer,  
1296 S., Gapp, B. V., Nijman, S.M.B., Brummelkamp, T.R., et al. (2015). A generic strategy for  
1297 CRISPR-Cas9-mediated gene tagging. *Nat. Commun.* *6*, 4–10. doi:10.1038/ncomms10237.
- 1298 Lander, E.S., Linton, L.M., Birren, B., Nusbaum, C., Zody, M.C., Baldwin, J., Devon, K.,  
1299 Dewar, K., Doyle, M., Fitzhugh, W., et al. (2001). Initial sequencing and analysis of the human  
1300 genome. *Nature* *409*, 860–921. doi:10.1038/35057062.
- 1301 Lewis, E.B. (1978). A gene complex controlling segmentation in *Drosophila*. *Nature* *276*, 565–  
1302 570. doi:10.1080/14740338.2018.1400530.
- 1303 Li, H. (2018). Minimap2: Pairwise alignment for nucleotide sequences. *Bioinformatics* *34*,  
1304 3094–3100. doi:10.1093/bioinformatics/bty191.
- 1305 Liao, Y., Smyth, G.K., and Shi, W. (2014). FeatureCounts: An efficient general purpose program

- 1306 for assigning sequence reads to genomic features. *Bioinformatics* 30, 923–930.  
1307 doi:10.1093/bioinformatics/btt656.
- 1308 Liu, Y., Ramos-Womack, M., Han, C., Reilly, P., Brackett, K.L., Rogers, W., Williams, T.M.,  
1309 Andolfatto, P., Stern, D.L., and Rebeiz, M. (2019). Changes throughout a genetic network mask  
1310 the contribution of Hox gene evolution. *Curr. Biol.* 29, 2157–2166.e6.  
1311 doi:10.1016/j.cub.2019.05.074.
- 1312 Liu, Z., Roesti, M., Marques, D., Hiltbrunner, M., Saladin, V., and Peichel, C. (2021).  
1313 Chromosomal fusions facilitate adaptation to divergent environments in threespine stickleback.  
1314 *Mol. Biol. Evol.*
- 1315 Love, M.I., Huber, W., and Anders, S. (2014). Moderated estimation of fold change and  
1316 dispersion for RNA-seq data with DESeq2. *Genome Biol.* 15, 1–21. doi:10.1186/s13059-014-  
1317 0550-8.
- 1318 Mabee, P.M., Crotwell, P.L., Bird, N.C., and Burke, A.C. (2002). Evolution of median fin  
1319 modules in the axial skeleton of fishes. *J. Exp. Zool.* 294, 77–90. doi:10.1002/jez.10076.
- 1320 Marçais, G., Delcher, A.L., Phillippy, A.M., Coston, R., Salzberg, S.L., and Zimin, A. (2018).  
1321 MUMmer4: A fast and versatile genome alignment system. *PLoS Comput. Biol.* 14, 1–14.  
1322 doi:10.1371/journal.pcbi.1005944.
- 1323 Marchinko, K.B. (2009). Predation’s role in repeated phenotypic and genetic divergence of  
1324 armor in threespine stickleback. *Evolution* 63, 127–138. doi:10.1111/j.1558-5646.2008.00529.x.
- 1325 Marlétaz, F., Firbas, P.N., Maeso, I., Tena, J.J., Bogdanovic, O., Perry, M., Wyatt, C.D.R., de la  
1326 Calle-Mustienes, E., Bertrand, S., Burguera, D., et al. (2018). Amphioxus functional genomics  
1327 and the origins of vertebrate gene regulation. *Nature* 564, 64–70. doi:10.1038/s41586-018-0734-  
1328 6.
- 1329 Martin, M. (2011). Cutadapt removes adapter sequences from high-throughput sequencing reads.  
1330 *EMBnet J.* 17, 10. doi:10.14806/ej.17.1.200.
- 1331 Martin, A., and Orgogozo, V. (2013). The loci of repeated evolution: A catalog of genetic  
1332 hotspots of phenotypic variation. *Evolution* 67, 1235–1250. doi:10.1111/evo.12081.
- 1333 Mattern, M. (2006). Phylogeny, Systematics, and Taxonomy of Sticklebacks. In *Biology of the*  
1334 *Three-Spined Stickleback*, S. Ostlund-Nilsson, I. Mayer, and F.A. Huntingford, eds. (CRC  
1335 Press), pp. 1–40. doi:10.1201/9781420004830.
- 1336 Mayr, E. (1970). *Populations, species, and evolution: An abridgment of animal species and*  
1337 *evolution* (Belknap Press).
- 1338 McIntyre, D.C., Rakshit, S., Yallowitz, A.R., Loken, L., Jeannotte, L., Capecchi, M.R., and  
1339 Wellik, D.M. (2007). Hox patterning of the vertebrate rib cage. *Development* 134, 2981–2989.  
1340 doi:10.1242/dev.007567.
- 1341 Miller, C.T., Beleza, S., Pollen, A.A., Schluter, D., Kittles, R.A., Shriver, M.D., and Kingsley,  
1342 D.M. (2007). *cis*-regulatory changes in *Kit Ligand* expression and parallel evolution of  
1343 pigmentation in sticklebacks and humans. *Cell* 131, 1179–1189. doi:10.1016/j.cell.2007.10.055.
- 1344 Miller, C.T., Glazer, A.M., Summers, B.R., Blackman, B.K., Norman, A.R., Shapiro, M.D.,  
1345 Cole, B.L., Peichel, C.L., Schluter, D., and Kingsley, D.M. (2014). Modular skeletal evolution in  
1346 sticklebacks is controlled by additive and clustered quantitative trait loci. *Genetics* 197, 405–420.

- 1347 doi:10.1534/genetics.114.162420.
- 1348 Montavon, T., Soshnikova, N., Mascrez, B., Joye, E., Thevenet, L., Splinter, E., De Laat, W.,  
1349 Spitz, F., and Duboule, D. (2011). A regulatory archipelago controls *Hox* genes transcription in  
1350 digits. *Cell* 147, 1132–1145. doi:10.1016/j.cell.2011.10.023.
- 1351 Moodie, G.E.E. (1972). Morphology, life history, and ecology of an unusual stickleback  
1352 (*Gasterosteus aculeatus*) in the Queen Charlotte Islands, Canada. *Can. J. Zool.* 50, 721–732.  
1353 doi:10.1139/z72-099.
- 1354 Nagayoshi, S., Hayashi, E., Abe, G., Osato, N., Asakawa, K., Urasaki, A., Horikawa, K., Ikee,  
1355 K., Takeda, H., and Kawakami, K. (2008). Insertional mutagenesis by the *Tol2* transposon-  
1356 mediated enhancer trap approach generated mutations in two developmental genes: *tcf7* and  
1357 *synembryn-like*. *Development* 135, 159–169. doi:10.1242/dev.009050.
- 1358 Nelson, T.C., and Cresko, W.A. (2018). Ancient genomic variation underlies repeated ecological  
1359 adaptation in young stickleback populations. *Evol. Lett.* 2, 9–21. doi:10.1002/evl3.37.
- 1360 Owen, R. (1848). On the archetype and homologies of the vertebrate skeleton.
- 1361 Paradis, E., and Schliep, K. (2019). Ape 5.0: An environment for modern phylogenetics and  
1362 evolutionary analyses in R. *Bioinformatics* 35, 526–528. doi:10.1093/bioinformatics/bty633.
- 1363 Perteau, M., Perteau, G.M., Antonescu, C.M., Chang, T.C., Mendell, J.T., and Salzberg, S.L.  
1364 (2015). StringTie enables improved reconstruction of a transcriptome from RNA-seq reads. *Nat.*  
1365 *Biotechnol.* 33, 290–295. doi:10.1038/nbt.3122.
- 1366 Reimchen, T.E. (1980). Spine deficiency and polymorphism in a population of *Gasterosteus*  
1367 *aculeatus*: an adaptation to predators? *Can. J. Zool.* 58, 1232–1244. doi:10.1139/z80-173.
- 1368 Reimchen, T.E. (1983). Structural relationships between spines and lateral plates in threespine  
1369 stickleback (*Gasterosteus aculeatus*). *Evolution* 37, 931–946. doi:10.1111/j.1558-  
1370 5646.1983.tb05622.x.
- 1371 Reimchen, T.E., and Nosil, P. (2002). Temporal variation in divergent selection on spine number  
1372 in threespine stickleback. *Evolution* 56, 2472–2483. doi:10.1111/j.0014-3820.2002.tb00172.x.
- 1373 Reimchen, T.E., and Nosil, P. (2004). Variable predation regimes predict the evolution of sexual  
1374 dimorphism in a population of threespine stickleback. *Evolution* 58, 1274–1281.  
1375 doi:10.1111/j.0014-3820.2004.tb01706.x.
- 1376 Reimchen, T.E., Bergstrom, C., and Nosil, P. (2013). Natural selection and the adaptive radiation  
1377 of Haida Gwaii stickleback. *Evol. Ecol. Res.* 15, 241–269.
- 1378 Ren, X., Yang, G.L., Peng, W.F., Zhao, Y.X., Zhang, M., Chen, Z.H., Wu, F.A., Kantanen, J.,  
1379 Shen, M., and Li, M.H. (2016). A genome-wide association study identifies a genomic region for  
1380 the polycerate phenotype in sheep (*Ovis aries*). *Sci. Rep.* 6, 1–7. doi:10.1038/srep21111.
- 1381 Renaud, J.B., Boix, C., Charpentier, M., De Cian, A., Cochenne, J., Duvernois-Berthet, E.,  
1382 Perrouault, L., Tesson, L., Edouard, J., Thinar, R., et al. (2016). Improved genome editing  
1383 efficiency and flexibility using modified oligonucleotides with TALEN and CRISPR-Cas9  
1384 nucleases. *Cell Rep.* 14, 2263–2272. doi:10.1016/j.celrep.2016.02.018.
- 1385 Rieseberg, L.H., Archer, M.A., and Wayne, R.K. (1999). Transgressive segregation, adaptation  
1386 and speciation. *Heredity* 83, 363–372. doi:10.1038/sj.hdy.6886170.
- 1387 Roberts Kingman, G.A., Lee, D., Jones, F.C., Desmet, D., Bell, M.A., and Kingsley, D.M.

- 1388 (2021a). Longer or shorter spines: Reciprocal trait evolution in stickleback via triallelic  
1389 regulatory changes in *Stanniocalcin2a*. *Proc. Natl. Acad. Sci.* *118*, e2100694118.  
1390 doi:10.1073/pnas.2100694118.
- 1391 Roberts Kingman, G.A., Vyas, D.N., Jones, F.C., Brady, S.D., Chen, H.I., Reid, K., Milhaven,  
1392 M., Bertino, T.S., Aguirre, W.E., Heins, D.C., et al. (2021b). Predicting future from past: The  
1393 genomic basis of recurrent and rapid stickleback evolution. *Sci. Adv.* *7*, 1–13.  
1394 doi:10.1126/sciadv.abg5285.
- 1395 Rosen, D.E. (1973). Interrelationships of higher euteleostean fishes. In *Interrelationships of*  
1396 *Fishes*, P.H. Greenwood, R.S. Miles, and C. Patterson, eds. (London: Academic Press), pp. 397–  
1397 513.
- 1398 Schindelin, J., Arganda-Carreras, I., Frise, E., Kaynig, V., Longair, M., Pietzsch, T., Preibisch,  
1399 S., Rueden, C., Saalfeld, S., Schmid, B., et al. (2012). Fiji: an open-source platform for  
1400 biological-image analysis. *Nat. Methods* *9*, 676–682. doi:10.1038/nmeth.2019.
- 1401 Schuelke, M. (2000). An economic method for the fluorescent labeling of PCR fragments. *Nat.*  
1402 *Biotechnol.* *18*, 233–234. doi:10.1038/72708.
- 1403 Scott, M.P., and Weiner, A.J. (1984). Structural relationships among genes that control  
1404 development: sequence homology between the Antennapedia, Ultrabithorax, and fushi tarazu  
1405 loci of *Drosophila*. *Proc. Natl. Acad. Sci.* *81*, 4115–4119. doi:10.1073/pnas.81.13.4115.
- 1406 Sham, P.C., and Curtis, D. (1995). Monte Carlo tests for associations between disease and alleles  
1407 at highly polymorphic loci. *Ann. Hum. Genet.* *59*, 97–105. doi:10.1111/j.1469-  
1408 1809.1995.tb01608.x.
- 1409 Shashikant, C.S., Kim, C.B., Borbély, M.A., Wang, W.C.H., and Ruddle, F.H. (1998).  
1410 Comparative studies on mammalian *Hoxc8* early enhancer sequence reveal a baleen whale-  
1411 specific deletion of a cis-acting element. *Proc. Natl. Acad. Sci. USA* *95*, 15446–15451.  
1412 doi:10.1073/pnas.95.26.15446.
- 1413 Simons, C., Pheasant, M., Makunin, I. V., and Mattick, J.S. (2006). Transposon-free regions in  
1414 mammalian genomes. *Genome Res.* *16*, 164–172. doi:10.1101/gr.4624306.
- 1415 Spitz, F., Gonzalez, F., and Duboule, D. (2003). A global control region defines a chromosomal  
1416 regulatory landscape containing the *HoxD* cluster. *Cell* *113*, 405–417. doi:10.1016/S0092-  
1417 8674(03)00310-6.
- 1418 Spoljaric, M.A., and Reimchen, T.E. (2011). Habitat-specific trends in ontogeny of body shape  
1419 in stickleback from coastal archipelago: Potential for rapid shifts in colonizing populations. *J.*  
1420 *Morphol.* *272*, 590–597. doi:10.1002/jmor.10939.
- 1421 Stern, D.L. (1998). A role of *Ultrabithorax* in morphological differences between *Drosophila*  
1422 species. *Nature* *396*, 463–466. doi:10.1038/24863.
- 1423 Stern, D.L., and Orgogozo, V. (2008). The loci of evolution: How predictable is genetic  
1424 evolution? *Evolution* *62*, 2155–2177. doi:10.1111/j.1558-5646.2008.00450.x.
- 1425 Stern, D.L., and Orgogozo, V. (2009). Is genetic evolution predictable? *Science* *323*, 746–751.  
1426 doi:10.1126/science.1158997.
- 1427 Swarup, H. (1958). Stages in the development of the stickleback *Gasterosteus aculeatus* (L.).  
1428 *Development* *6*, 373–383. doi:10.1242/dev.6.3.373.

- 1429 Thisse, C., and Thisse, B. (2008). High-resolution *in situ* hybridization to whole-mount zebrafish  
1430 embryos. *Nat. Protoc.* *3*, 59–69. doi:10.1038/nprot.2007.514.
- 1431 Thompson, P.J., Macfarlan, T.S., and Lorincz, M.C. (2016). Long terminal repeats: From  
1432 parasitic elements to building blocks of the transcriptional regulatory repertoire. *Mol. Cell* *62*,  
1433 766–776. doi:10.1016/j.molcel.2016.03.029.
- 1434 Tian, L., Rahman, S.R., Ezray, B.D., Franzini, L., Strange, J.P., Lhomme, P., and Hines, H.M.  
1435 (2019). A homeotic shift late in development drives mimetic color variation in a bumble bee.  
1436 *Proc. Natl. Acad. Sci. USA* *116*, 11857–11865. doi:10.1073/pnas.1900365116.
- 1437 Varadharajan, S., Rastas, P., Löytynoja, A., Matschiner, M., Calboli, F.C.F., Guo, B.,  
1438 Nederbragt, A.J., Jakobsen, K.S., and Merilä, J. (2019). A high-quality assembly of the nine-  
1439 spined stickleback (*Pungitius pungitius*) genome. *Genome Biol. Evol.* *11*, 3291–3308.  
1440 doi:10.1093/gbe/evz240.
- 1441 Wainwright, P.C., and Longo, S.J. (2017). Functional innovations and the conquest of the oceans  
1442 by acanthomorph fishes. *Curr. Biol.* *27*, R550–R557. doi:10.1016/j.cub.2017.03.044.
- 1443 Wang, Y., Zhang, C., Wang, N., Li, Z., Heller, R., Liu, R., Zhao, Y., Han, J., Pan, X., Zheng, Z.,  
1444 et al. (2019). Genetic basis of ruminant headgear and rapid antler regeneration. *Science* *364*.  
1445 doi:10.1126/science.aav6335.
- 1446 Warren, R.W., Nagy, L., Selegue, J., Gates, J., and Carroll, S. (1994). Evolution of homeotic  
1447 gene regulation and function in flies and butterflies. *Nature* *372*, 458–461.  
1448 doi:10.1038/372458a0.
- 1449 Weisenfeld, N.I., Yin, S., Sharpe, T., Lau, B., Hegarty, R., Holmes, L., Sogoloff, B., Tabbaa, D.,  
1450 Williams, L., Russ, C., et al. (2014). Comprehensive variation discovery in single human  
1451 genomes. *Nat. Genet.* *46*, 1350–1355. doi:10.1038/ng.3121.
- 1452 Wells, J. (2000). *Icons of evolution: science or myth* (Regnery Publishing).
- 1453 Wucherpfennig, J.I., Miller, C.T., and Kingsley, D.M. (2019). Efficient CRISPR-Cas9 editing of  
1454 major evolutionary loci in sticklebacks. *Evol. Ecol. Res.* *20*, 1–29.
- 1455
